## Photoperiodic control of the Arabidopsis proteome reveals a translational coincidence mechanism

Daniel D Seaton<sup>1,5\*</sup>, Alexander Graf<sup>2,4,\*</sup>, Katja Baerenfaller<sup>2</sup>, Mark Stitt<sup>3</sup>, Andrew J. Millar<sup>1,#</sup> and Wilhelm Gruissem<sup>2,#</sup>

5 \*equal contribution

#corresponding authors

<sup>1</sup>SynthSys and School of Biological Sciences, C.H. Waddington Building, University of Edinburgh, Edinburgh EH9 3BF, Scotland, UK

10 <sup>2</sup>Institute of Molecular Plant Biology, Department of Biology, ETH Zurich, Universitaetstrasse 2, 8092 Zurich, Switzerland

<sup>3</sup>System Regulation Group, Max Planck Institute of Molecular Plant Physiology, Am Muehlenberg 1, 14476 Potsdam-Golm, Germany

<sup>4</sup>Current address: Plant Proteomics Group, Max Planck Institute of Molecular Plant Physiology, Am Muehlenberg 1, 14476 Potsdam-Golm, Germany

15 <sup>5</sup>Current address: European Molecular Biology Laboratory, European Bioinformatics Institute, Wellcome Genome Campus, Hinxton, CB10 1SD, UK

Running title (no more than 40 characters including spaces): Translational Coincidence in Arabidopsis

20 ORCID

AJM - 0000-0003-1756-3654

WG - 0000-0002-1872-2998

AG – 0000-0002-6696-5206

25 DS – 0000-0002-5222-3893

KB - 0000-0002-1904-9440

30 MS - 0000-0002-4900-1763

## Abstract

Plants respond to seasonal cues, such as the photoperiod, to adapt to current conditions and to prepare for environmental changes in the season to come. To assess photoperiodic responses at the protein level, we  
35 quantified the proteome of the model plant *Arabidopsis thaliana* by mass spectrometry across four  
photoperiods. This revealed coordinated changes of abundance in proteins of photosynthesis, primary and  
secondary metabolism, including pigment biosynthesis, consistent with higher metabolic activity in long  
photoperiods. Higher translation rates in the daytime than the night likely contribute to these changes via  
40 rhythmic changes in RNA abundance. Photoperiodic control of protein levels might be greatest only if high  
translation rates coincide with high transcript levels in some photoperiods. We term this proposed  
mechanism ‘translational coincidence’, mathematically model its components, and demonstrate its effect  
on the *Arabidopsis* proteome. Datasets from a green alga and a cyanobacterium suggest that translational  
coincidence contributes to seasonal control of the proteome in many phototrophic organisms. This may  
explain why many transcripts but not their cognate proteins exhibit diurnal rhythms.

45

Keywords:

Proteomics / circadian rhythms / metabolism / photoperiod / seasonality

## Introduction

50 Changes in photoperiod have wide-ranging effects on the physiology, metabolism, and development of many species, from migration and hibernation in birds and mammals to diapause in insects (Dardente et al., 2014; Saunders, 2013). In *Arabidopsis*, these responses include changes in flowering time (Salazar et al., 2009; Yanovsky and Kay, 2002), hypocotyl elongation (Nozue et al., 2007), freezing tolerance (Lee and Thomashow, 2012) stomatal opening (Kinoshita et al., 2011), C-allocation and growth (Sulpice et al., 2014; Mengin et al., 2017). These diverse responses to photoperiod allow plants to adjust to the predictable environmental changes that accompany the changing seasons. Here, we investigate photoperiod responses at the proteome level, and ask two related questions: How does the proteome change with photoperiod, and which regulatory mechanisms contribute to changes in protein abundance across photoperiods?

Plants use daytime sunlight as a source of energy to drive photosynthesis. As a result, day length has strong effects on metabolism and growth, with increasing photoperiod length leading to a progressive increase in the rate of growth, which is often accompanied by increased levels of many metabolites (Gibon et al., 2004; Sulpice et al., 2014). Furthermore, growth under different photoperiods places different demands on plant physiology and metabolism. In *Arabidopsis*, for example, the major carbon source at night comes from the mobilisation of transient starch that is accumulated in leaf cell chloroplasts during the light period (Graf and Smith, 2011; Smith and Stitt, 2007; Stitt and Zeeman, 2012). Rates of starch mobilisation to sucrose are higher during short nights relative to long nights, whereas daytime partitioning of photosynthate into starch is higher during short compared to long days, and these rates change progressively with photoperiod duration (Sulpice et al., 2014; Mengin et al., 2017). Pathways of primary carbon metabolism might be expected to change in concert with the availability of carbon and its partitioning. Secondary metabolism will be affected not only by changing availability of primary carbon substrates, but the accumulation of certain secondary metabolites will also be affected by seasonal selective pressures, for example for compounds that defend against seasonal pests and pathogens (Textor and Gershenzon, 2009). In general, it is not well understood how investment in protein synthesis balances these different demands.

In previous studies we analysed starch turnover, metabolite levels and the rates and diurnal distribution of growth (Sulpice et al., 2014), the transcriptional response of central clock genes, and the dawn transcriptome (Flis et al., 2016) in *Arabidopsis* Col-0 growing in a 6, 8, 12 or 18 h photoperiod. Quantitative proteomics can characterise changes in protein abundance with photoperiod, as was recently reported for a small number of *Arabidopsis* proteins (Baerenfaller et al., 2015). Here we measured the regulation of the *Arabidopsis* proteome using quantitative mass spectrometry and identified >1700 proteins that change in abundance across four photoperiods. The changes revealed adjustments to growth in different photoperiods, with coordinated changes of protein investment in photosynthesis and primary carbon metabolism, consistent with the higher demand placed on these pathways under long photoperiods.

The mechanisms underlying photoperiod-responsive, physiological changes involve the integration of diel (daily) signals from the environment with timing information from the circadian clock. Several response mechanisms, including flowering time and elongation growth, share a common form known as the 'external coincidence' mechanism, and have been sufficiently characterised to inform quantitative, mathematical models (Keily et al., 2013; Seaton et al., 2015). Briefly, they involve intermediate transcriptional regulators, such as *CONSTANS*, *FKF1* and *CBF1*, which are among the >30% of clock-controlled transcripts in *Arabidopsis* (Covington et al., 2008; Edwards, 2006; Michael et al., 2008b). Environmental signals such as light or darkness alter the stability or activity of their cognate proteins and, if the timing of these changes coincides with the phase of rhythmic expression, (Salazar et al., 2009; Yanovsky and Kay, 2002). These transcriptional cascades are known from specialised examples, however, and it is unclear whether these or

equivalent coincidence mechanisms act in a general way to mediate the many photoperiodic responses observed in plant physiology. Their canonical phenotypes, especially seasonal reproduction, are the most important, known effects of plant circadian regulation. But it seems unlikely that these few traits account for the evolution of pervasive, circadian regulation across the genome (Millar, 2016).

Photoperiodic regulation of the proteome could be driven by changes in RNA levels, translation, and/or protein turnover. We recently showed that there are major photoperiod-dependent changes in global transcript abundance that affect large sets of genes involved in metabolism and growth (Flis et al., 2016), and that transcripts with different levels in long and short photoperiods are over-represented in categories such as flavonoid biosynthesis and sugar transport (Baerenfaller et al., 2015). In the absence of compensating regulation, these changes in RNA abundance are expected to result in changes in protein level. At the post-transcriptional level, multiple lines of evidence have demonstrated changes in the rate of plant protein synthesis in response to light, with translation proceeding more rapidly during the day than during the night (Ishihara et al., 2015; Juntawong and Bailey-Serres, 2012; Liu et al., 2012; Missra et al., 2015; Pal et al., 2013; Piques et al., 2009). This translational regulation suggests that the profile of protein synthesis across the diel cycle will depend on the duration of the light period, even without circadian regulation. However, higher rates of translation in the light on their own would tend to lead to a general increase in the abundance of proteins. The question arises whether the light-dependent increase in translation might interact with the widespread rhythmicity in RNA levels, which affects up to 50% of genes in Arabidopsis (Baerenfaller et al., 2012; Michael et al., 2008b, Blasing et al., 2005). These known diel changes of translation and transcript levels prompted a simple, data-driven model that predicts how these two well-characterised effects might systematically alter protein levels. Briefly, our model suggests that transcripts that peak early in the 24 h cycle will be efficiently translated in long and short photoperiods, whereas transcripts that peak later in the 24 h cycle will be efficiently translated in long but not in short photoperiods. The proposed mechanism, which we termed ‘translational coincidence’, was tested using our quantitative data on protein abundance across a range of photoperiods.

Our data implicate multiple mechanisms in the regulation of protein abundance with photoperiod. Changes in RNA abundance contribute to some changes in protein abundance. However, our data are also consistent with the predicted effects of translational coincidence affecting hundreds of proteins in Arabidopsis. Analysis of existing experimental data from cyanobacteria and algae indicate that translational coincidence most likely applies broadly, across many phototrophic organisms. These results reveal new insights into photoperiod responses in plants, and the mechanisms that drive them.

## Results

### 125 **Photoperiod lengths affect protein abundance**

The effect of changes in photoperiod length on the proteome of Arabidopsis was analyzed in wild-type plants grown for nine days in four different light/dark cycles equaling 6h, 8h, 12h and 18h photoperiods and harvested at the end of the day (ED) (Fig 1A; see Materials and Methods). Protein abundance at ED most directly captures the impact of light period duration on the proteome. Previous studies found only few proteins that significantly changed in abundance between end of night (EN) and ED in a 16h or 8h photoperiod (Baerenfaller et al., 2015, 2012), as expected if most of the detected proteins have long half-lives (median in one recent study was >6 days (Li et al., 2017)). It is therefore likely that for most proteins, their abundance at ED reflects their abundance over the entire 24 h cycle.

Quantitative data was obtained for 4344 proteins (Table EV1), which increased the coverage of enzymes in all metabolic pathways (Table EV2) compared to previous reports of Arabidopsis leaf 6 proteins quantified at four leaf growth stages and in three different growth conditions (Baerenfaller et al., 2015, 2012). Proteomic studies, especially with plants, tend to show overrepresentation of abundant proteins in the set of quantified proteins. While this is also true for the present data set, low abundant proteins annotated in the KEGG pathways of Basal Transcription Factors (5) and Hormone Signaling (13) were also quantified (Table EV2).

The variation between biological samples was comparable in all four photoperiods. Moreover, the average coefficient of variation between 0.059 and 0.074 is very low for a proteomics data set (Fig 1B). Principal component analysis completely separated the samples according to the photoperiods while biological replicates remained grouped together, confirming the reproducibility of the dataset (Fig 1C). The first and second principal components together accounted for 95.7% of the total variation.

We found 1781 proteins (41%) that changed significantly ( $p < 0.05$ , ANOVA) in abundance between the four photoperiods (Table EV3). Of these, 389 proteins had a maximum fold change (FC) greater than 1.5 (Fig 1D). A comparison between four comparable growth stages of Arabidopsis leaf 6 in plants grown in a 8h or 16h photoperiod also showed that 192 of 1200 quantified proteins had significant abundance changes ( $p < 0.05$ ), with maximum fold changes of at least 1.5 for 83 proteins (Baerenfaller et al., 2015). The larger number of changing proteins we identified could be explained by the larger span of photoperiods as well as differences in growth regimes and sampled tissues. However, the fold changes of the proteins with significant changes at a p-value threshold of 0.05 in both datasets were positively correlated ( $\rho = 0.46$ ), indicating similar trends. Here, 757 proteins had higher abundance in longer photoperiods while 1024 proteins showed lower abundance. Boxplots of all photoperiod-responsive proteins revealed that proteins were up-regulated mainly between the three longest photoperiods (8h to 18h) while only few proteins increased in abundance between the two shortest photoperiods (6h to 8h). In contrast, the decrease in protein abundance was more evenly distributed across all photoperiods (Fig EV1). The progressive change of protein abundance is also reflected by a pairwise comparison between photoperiods. Only few proteins change significantly when comparing 8h vs 6h (12), 12h vs 8h (184) or 18h vs 12h (177) (Tables EV3 and EV4). However, high numbers are observed when comparing 18h vs 8h (1035) or 18h vs 6h (1452). This resembles the progressive change in transcript levels between a 6h, 8h, 12h and 18 h photoperiod (Flis et al., 2016).

More than half (50.3 %) of the observed changes in protein abundance was below a FC of 1.3, with a mean FC of approximately 1.2 (Fig 1D, Table EV4). While these changes are relatively small, their potential biological significance is illustrated by the enrichment of gene ontology (GO) terms within narrow ranges of FC. This was assessed by binning proteins into FC windows of 0.2. Each bin was analysed for overrepresentation of GO terms compared to all quantified proteins. The overrepresentation analysis revealed that enriched GO annotations can be found in each of the applied FC bins (Fig 2A, Table EV5), and in most cases a particular GO category was overrepresented in a specific FC bin. For example, 338 proteins annotated to the GO category translation were found in the whole data set. In a narrow bin ranging from 1.1 to 1.3 FC, 106 of these proteins were identified as down-regulated in longer photoperiods. This results in a significant overrepresentation of translation-related proteins in this FC bin (Fisher Exact test,  $p < 10^{-18}$ ). High enrichments in specific FC bins were also observed for other GO categories including the tricarboxylic acid (TCA) cycle (GO:0006099, bin Up 1.1 to 1.3), translational elongation (GO:0006414, bin Down 1.1 to 1.3), ribosome biogenesis (GO:0042254, bin Down 1.0 to 1.2), glucosinolate biosynthesis (GO:0019761, bin Up 1.2 to 1.4) and indoleacetic acid biosynthesis (GO:0009684, bin Up 1.3 to 1.5). Heatmaps of the

overrepresented GO terms in the different FC bins further illustrate that changes in abundance of functionally related proteins is highly orchestrated in a narrow FC window (Fig 2B,C).

## 180 **Photoperiod length affects photosynthesis, metabolism and growth**

As photoperiods become longer, plant metabolism and energy management are adjusted to the increased availability of light and shorter heterotrophic intervals during the night (Baerenfaller et al., 2015; Sulpice et al., 2014). Changes in the plant proteome reflect this plasticity at multiple levels, from primary photosynthesis to secondary metabolism, cellular regulation and growth. For example, we quantified 57 of 185 77 proteins annotated in the KEGG pathway (Kanehisa et al., 2016) of photosynthesis (ath00195) and 22 of the quantified proteins were more abundant in longer photoperiods (Table EV5; Appendix Fig S1). These changes affect all complexes of the electron transport chain, several subunits of the ATP synthase complex as well as ferredoxin 1 (FD1) and ferredoxin-NADP-oxidoreductase 1 (FNR1) (Fig 3A,B). While most proteins in our dataset showed a gradual change in abundance over all photoperiods (Fig EV1), changes in abundance of photosystem I and II related proteins occurred predominantly between the 6h and 12h photoperiods, beyond which the protein levels reached a plateau (Fig 3A,B). The only proteins of the photosynthetic electron transport chain with lower abundance in long photoperiods are plastocyanin 1 and 2 (PETE1 and PETE2), which are responsible for transporting electrons from the cytochrome-b<sub>6</sub>f-complex to photosystem (PS) I. Similar concerted changes in protein abundance were also observed in the light 195 harvesting and chlorophyll binding complexes (LHCII) surrounding PSII (Fig 3C; Table EV3, Table EV5), which are correlated with changes in their transcript levels (Baerenfaller et al., 2015; Flis et al., 2016).

Differential changes in enzyme abundance were found for isoprenoid metabolic pathways, including biosynthesis of chlorophyll. For example, 13 enzymes involved in chlorophyll biosynthesis were down-regulated in longer photoperiods (Table EV5, Appendix Fig S2). These included enzymes in heme 200 biosynthesis (HEMA1, HEMB1, HEME2 and HEMG2) as well as the magnesium chelatase GUN5 and the NADPH:protochlorophyllide oxidoreductases PORB and PORC (Fig 3D). In contrast, increased enzyme abundance was observed for the red chlorophyll catabolite reductase ACD2, which catalyzes a key reaction of chlorophyll catabolism.

Enzymes in primary carbon metabolism were broadly up-regulated in longer photoperiods. Proteins with 205 higher abundance in longer photoperiods are enriched for the KEGG pathways of carbon fixation (ath00710), the TCA cycle (ath00020) and starch and sucrose metabolism (ath00500) (Table EV5; Appendix Figs S3, S4, S5). Their abundance changes are highly orchestrated, and this was especially pronounced for the TCA and Calvin-Benson cycles (Table EV5). Similarly, proteins in sucrose metabolism including sucrose synthesis, transport and degradation accumulated to higher levels in longer photoperiods (Fig 4A; Appendix 210 Fig S5). Protein abundance in the metabolic pathways of starch synthesis and degradation was also strongly affected by photoperiod length. For example, proteins such as APL3, one of the two regulatory subunits of plastid ADP-glucose pyrophosphorylase (AGPase) that catalyses the first committed step in starch synthesis, and plastid phosphoglucomutase (PGM1) that regulates the partitioning of carbon into starch (Fernie et al., 2001), are strongly increased while APL1 is decreased in the longest photoperiod (Fig 215 4A). Several key enzymes for starch degradation also accumulated to higher levels with increasing photoperiod length (Fig 4B), consistent with faster rate of starch degradation during the night in long photoperiods (Baerenfaller et al., 2015; Sulpice et al., 2014; Smith and Stitt, 2007).

Our data show that Arabidopsis can also reprogram sulfur metabolism (Fig 4C) and adjust the abundance of enzymes for lipid metabolism to the prevailing photoperiod length (Table EV5, Appendix Fig 6, 7). The 220 changes in abundance of sulfate assimilating enzymes indicate a shift from the synthesis of primary to secondary sulfur-containing metabolites in longer photoperiods, including a concerted increase in

abundance of enzymes involved in glucosinolate biosynthesis (Fig 4C, Table EV5; Appendix Fig S8). This is consistent with increased availability of resources for the production of defense-related metabolites in plants growing in long photoperiods (Baerenfaller et al., 2015; del Carmen Martínez-Ballesta et al., 2013).  
225 Several Arabidopsis enzymes in fatty acid degradation are more abundant in long photoperiods (Table EV5, Appendix Fig 6) while levels of several enzymes for fatty acid synthesis are reduced (Table EV5, Appendix Fig 7). This indicates that in longer photoperiods Arabidopsis has a higher capacity for beta-oxidation of fatty acids, consistent with the turnover of approximately 4% of the total fatty acids in one diel cycle (Bao et al., 2000).  
230 Increased photoperiod length results in a highly active metabolic state of the Arabidopsis rosette leaves (Sulpice et al., 2014). Our results show that this was correlated with the down-regulation of pathways related to cell cycle and protein biosynthesis. A GO term overrepresentation analysis using photoperiod-responsive proteins with lower abundance in long photoperiods revealed that most of the 39 significantly enriched GO categories are related to transcription, translation and cell cycle (Table EV2). The concerted  
235 changes in protein abundance of the translation machinery were particularly striking. Among the 33 quantified proteins annotated for ribosome biogenesis, 19 were less abundant in longer photoperiod (Table EV5 and Fig EV2A) and no proteins in this category had increased levels. We also quantified 151 proteins annotated in the KEGG pathway for ribosomes, of which 85 were less abundant in longer photoperiods (Table EV5 and Fig EV2B). Only two ribosomal proteins, RPS6A and RPS6B that are functionally redundant  
240 and essential for the 40S ribosomal subunit (Creff et al., 2010), are more abundant in longer photoperiods.

Together, these results are consistent with the reduced vegetative growth period and early flowering of Arabidopsis plants in long photoperiods, which is compensated by high metabolic activity of the smaller rosette (see Supplemental Text for an extended description of additional functional categories displaying significant changes).

## 245 **Correlated changes in transcript and protein abundance**

Transcriptional regulation is one potential mechanism for explaining changes in protein levels across photoperiods. The Arabidopsis transcriptome at EN and ED shows large photoperiod-dependent changes (Flis et al., 2016). We compared photoperiod-dependent changes in protein abundance at ED to photoperiod-dependent transcriptome changes at ED and EN. Only transcript-protein pairs were  
250 considered that showed significant changes in both transcript ( $p < 0.05$ , FC  $> 1.5$ ) and protein level ( $p < 0.05$ ). The protein abundance changes at ED were positively correlated both with transcript changes at ED ( $\rho = 0.63$ ) and EN ( $\rho = 0.47$ ) (Fig EV3A). An overrepresentation analysis of GO terms showed that distinct cellular functions are enriched in transcript-protein pairs that have the same or opposite accumulation pattern, indicating that changes in transcript and protein abundance between photoperiods are highly  
255 orchestrated (Table EV7). Next, we identified a subset of transcripts that has no discernible diurnal rhythm in expression (see materials and methods for details). We expect the estimates of changes in abundance across photoperiods to be especially accurate for these arrhythmic transcripts because these estimates are not affected by the sparse (two time-points) sampling of expression in each photoperiod. As expected, the correlation of transcript and protein abundance was much stronger for these arrhythmic transcripts both at  
260 ED ( $\rho = 0.86$ ) and EN ( $\rho = 0.85$ ) (Fig EV3B). Together, these results demonstrate the expected relationship between abundance changes at transcript and protein levels, although this relationship is not strictly followed in all cases, similar to other species and different experimental conditions (reviewed in Liu et al., 2016; Vogel and Marcotte, 2012).

## Light-induced translation provides a mechanism for photoperiodic control of protein expression

265

Post-transcriptional mechanisms, such as regulation of translation rate, can also play a role in determining protein abundance. In Arabidopsis, light induces proteome-wide changes in protein synthesis, as measured by  $^{13}\text{CO}_2$  labelling (Ishihara et al., 2015) or polysome loading (Juntawong and Bailey-Serres, 2012; Liu et al., 2012; Missra et al., 2015; Pal et al., 2013; Piques et al., 2009). We considered the effects of this light-dependent translational regulation on the relationship between the transcriptome and proteome in different photoperiods.

270

For a gene that is transcriptionally regulated by the circadian clock, the timing of protein synthesis depends on the circadian phase of RNA expression and the light:dark regulation of RNA translation. Coincidence of high RNA transcript levels with a high rate of translation per transcript (as occurs during the light period) is expected to increase protein synthesis. For a dawn-phased transcript with peak abundance at 2h after lights-on, for example, high transcript levels coincide with the light interval regardless of photoperiod (Fig 5). We consider the simple case where the phase of the clock is set by dawn alone, as this is close to the behaviour of the Arabidopsis clock (see Discussion, and Edwards et al., 2010). An evening-phased transcript, for example peaking 12h after dawn, has high transcript levels coinciding with the light interval only under long photoperiods (Fig 5)

275

280

This model predicts that differences in the rates of protein synthesis across photoperiods are at least in part due to changes in the coincidence of rhythmic RNA expression with light and the resultant higher rates of translation. We term this mechanism 'translational coincidence'. Such an interaction between internal (circadian) and external (light:dark) rhythms defines the general 'external coincidence' mechanism of photoperiod sensitivity, equivalent to the mechanism proposed to control flowering time (Song et al., 2015).

285

## Modulation of photoperiod-dependent protein expression is explained by translational coincidence

If circadian-controlled gene expression contributes to changes in protein levels across photoperiods, we expect an over-representation of circadian-controlled genes in the set of differentially regulated proteins. Comparing the consensus set of circadian-controlled transcripts reported in Covington et al. (2008) to the photoperiod-regulated proteins in our present data set, this is indeed the case ( $p < 0.001$ ; hypergeometric test). We therefore tested the more specific predictions of the translational coincidence hypothesis, relating late-peaking transcripts to protein accumulation in long photoperiods, before including the predicted effects of translational regulation (Fig 6A).

290

295

Starting first from the transcript regulation, we examined the timing of transcript expression for proteins identified as upregulated and downregulated in long photoperiods. Full diel time series data were previously acquired (Bläsing et al., 2005). This dataset is particularly suitable in this context because it reveals transcript dynamics in a 12h photoperiod in soil-grown adult rosettes of a similar age (35 days) to those used in our experiments (30 days). We augmented the dataset with the peak-phase annotation calculated in the DIURNAL database by waveform interpolation (Michael et al., 2008a; Mockler et al., 2007), binned into 2h windows. Among the sets of evening-phased transcripts, proteins that accumulated to higher levels in long photoperiods were over-represented. Such proteins were under-represented among sets of dawn-phased transcripts (Fig 6B). The converse was true for proteins that had lower abundances in long photoperiods (Fig 6B). These observations are consistent with the translational coincidence hypothesis.

300

305



Starting next from the protein changes, we calculated changes in protein level between short (6h) and long (18h) photoperiods for all proteins (i.e. not only those identified as changing significantly in protein level). These were binned by the phase of transcript expression, for the subset of 547 proteins with transcripts displaying rhythms with peak/mean amplitude >1.5 (Fig 6C). This showed a clear pattern of responses across the diurnal cycle, with dawn-phased transcripts tending to have proteins with lower abundance and evening-phased transcripts tending to have higher abundance proteins, with a progressive response across all four photoperiods (Fig EV4). This association was also observed in the dataset of (Baerenfaller et al., 2015) of Arabidopsis leaf 6 protein levels in 8h and 16h photoperiods (Fig EV5). Importantly, similar patterns of photoperiod sensitivity were observed in the protein abundances measured at either EN or ED time point, and across different leaf developmental stages (Baerenfaller et al., 2015). This consistency between datasets confirms that the observed phase relationship does not result from the sampling times in our dataset, either during development or at the time of day.

We next simulated translational coincidence in a quantitative model, using both transcript dynamics (Bläsing et al., 2005) and changes in bulk protein synthesis rates measured by <sup>13</sup>CO<sub>2</sub> labelling (Pal et al., 2013) to predict changes in protein synthesis across photoperiods (Fig 6D). This model accounts for changes in protein synthesis depending on light and mRNA abundance, normalised to the changes in the rate of bulk protein synthesis with photoperiod (i.e. accounting for changes in growth with photoperiod), and is given by:

$$P_{normalised} = \frac{R \int_{t=0}^{t_{dusk}} m(t) + \int_{t=t_{dusk}}^{24} m(t)}{(R-1)t_{dusk} + 24}$$

Where  $P_{normalised}$  is the predicted, normalised protein abundance,  $R$  is the ratio of translation in the light compared to the dark,  $m(t)$  is the mRNA abundance as a function of time, and  $t_{dusk}$  is the time of dusk (see Materials and methods: Translational coincidence for detailed model description). We predicted changes in protein levels between 6h and 18h photoperiods for 251 proteins with a high-amplitude rhythm in their transcript (>1.7-fold difference between peak level and mean). Our measured protein levels for these photoperiods, which were not used to build the model, can now test its predictions. There was a highly significant agreement (Pearson's rho = 0.41,  $p < 10^{-10}$ ) between the model prediction and the measured changes in protein levels, with the model also quantitatively matching the proportional relationship (gradient of slope = 0.75). This result demonstrates that the effect of photoperiod on protein accumulation quantitatively matched what we expect from the translational coincidence mechanism, which follows from the rhythmic transcript dynamics and protein synthesis rates.

While the translational coincidence model captured this important trend in the whole dataset, individual proteins varied widely, as quantified by the correlation between model predictions and measurements (Pearson's rho = 0.41). Several factors are likely to contribute to this variation, including transcript-specific differences in the sensitivity of translation to light, protein-specific changes in turnover with photoperiod, photoperiod-specific transcriptional regulation in response, for example, to changes in sugar- or light-signalling (Flis et al., 2016), and experimental error in measurements of transcript and protein abundances.

In order to adjust for potentially confounding effects of transcriptional regulation, we removed proteins from consideration according to two complementary criteria aimed at identifying transcripts under consistent regulation by the circadian clock. First, we compared the transcriptome time series dataset from Bläsing et al. (2005) to a pseudo-time series dataset based on EN and ED samples in 4, 6, 8, 12, and 18h photoperiods from Flis et al. (2016). This pseudo-time series dataset is formed by averaging the EN samples to represent ZT0, and taking successive ED time points to represent ZT4, 6, 8, 12, and 18. A high degree of correlation between these datasets then indicates an underlying (putatively circadian) rhythm that is robust

350 to changes in photoperiod. As a validation of this criterion, we note that core circadian clock genes such as *CCA1*, *PRR7*, *ELF3*, and *TOC1* all pass this test (Fig EV6). Taking a threshold of Pearson's correlation of 0.75 reduced the set of proteins considered from 547 to 341. The pattern of photoperiod response remained the same after this filtering (compare Fig EV7A,B).

355 Second, we compared expression dynamics in continuous light to dynamics in light:dark cycles. Genes that are predominantly regulated by the circadian clock are expected to have similar rhythms of transcript accumulation in both conditions. We therefore identified transcripts with circadian-dominant accumulation dynamics by calculating the Pearson's correlation coefficient between the (Bläsing et al., 2005) diel and a circadian transcriptome time series (Covington and Harmer, 2007), again filtering out transcripts with correlation coefficients less than 0.75. As above, we note that core clock genes pass this test (Fig EV6). This filter reduced the number of proteins considered from 547 to 142. Figure EV7C shows that the qualitative distribution of protein level changes remains similar after this filtering. Furthermore, this pattern remained after combining both the circadian and photoperiod filters, reducing the number of proteins considered further to 125 (Fig EV7D).

365 The reduced set of transcripts remaining after filtering is too small to draw conclusions using enrichment analyses. However, specific examples illustrate the potential effects of a translational coincidence mechanism on plant physiology in changing photoperiods. Two examples of dawn-phased transcripts with decreases in protein levels in longer photoperiods are GENOMES UNCOUPLED 4 (*GUN4*) and *GUN5* (Fig EV8A). These proteins are involved in chlorophyll biosynthesis, and their transcripts are robustly phased to dawn by the circadian clock. Two examples of evening-phased transcripts that increase in protein level with photoperiod are ALPHA-GLUCAN PHOSPHORYLASE 2 (*PHS2*) and ISO-AMYLASE 3 (*ISA3*), which are involved in starch turnover (Fig EV8B).

375 In summary, our results are consistent with the translational coincidence hypothesis, whereby protein levels are influenced by the coordinated timing of transcript expression and light-regulated protein synthesis. Translational coincidence may be an important regulatory mechanism for slowly turning over proteins with transcripts that are regulated by the circadian clock. The mechanism changes protein abundance in response to photoperiod, without photoperiodic regulation of transcript abundance. In coupling *daily* RNA rhythms to *seasonal* physiology, it supports broadly the same operating principle that has been highly adapted in the specialised, photoperiodic flowering mechanism (see Discussion).

## 380 **Translational coincidence as a general mechanism of photoperiod sensitivity in phototrophs**

Translational coincidence depends on only two key parameters, faster protein synthesis in the light and circadian control of gene expression, which might operate in many phototrophic organisms. We therefore examined existing proteome and transcriptome datasets for the green alga *Ostreococcus tauri* and the cyanobacteria *Cyanothece* ATCC51142 (proteome) and *Synechococcus elongatus* PCC7942 (transcriptome).

385 Quantitative proteome time courses across light:dark cycles using stable isotope labelling in *O. tauri* (Martin et al., 2012) and *Cyanothece* (Aryal et al., 2011) allow inference of relative rates of protein synthesis in the light and dark on a protein-by-protein basis, analogous to calculations performed for *Arabidopsis* (Ishihara et al., 2015; Pal et al., 2013). The median relative rates of isotope incorporation in the light compared to the dark were 4.7 for *O. tauri* and 3.2 for *Cyanothece* (Fig 7A). Protein synthesis and biomass accumulation measurements show similar patterns in *Synechococcus* spp. (Glover and Smith, 1988), the unicellular red alga *Cyanidioschyzon merolae* (Miyagishima et al., 2014), the cyanobacterium *Arthrospira plantensis* (Matallana-Surget et al., 2014), and the marine diatom *Thalassiosira pseudonana* (Ashworth et al., 2013). Diel and circadian regulation of the transcriptome has also been tested. In *O. tauri*,

about 80% of transcripts change across a diel cycle (Monnier et al., 2010), while in *Synechococcus* about  
395 30% of transcripts cycle with circadian rhythms (Ito et al., 2009) (Fig 7C). Thus, both light-induced protein  
synthesis and diel regulation of gene expression are observed in diverse species.

In *Arabidopsis*, many proteins have a half-life of several days (Li et al., 2017) and the half-life of total  
protein was estimated as 3-4 days (Ishihara et al., 2015). Because of these low relative protein turnover  
400 rates, diel transcript cycling does not generally translate to diel dynamics at the protein level (Baerenfaller  
et al., 2012; Stitt and Gibon, 2014; Piques et al., 2009). We examined estimated rates of protein turnover in  
*Arabidopsis*, *O. tauri* and *Cyanothece* based on isotope labelling and quantitative proteome data (Aryal et  
al., 2011; Li et al., 2017; Martin et al., 2012; see Expanded View Information for details). The distributions of  
calculated rates of protein turnover in Fig 7B show that low rates of degradation are found in all three  
organisms. Furthermore, only about 5% of measured proteins in *Synechococcus* have diel dynamics, which  
405 is also consistent with a slow turnover of most measured proteins (Guerreiro et al., 2014). Translational  
coincidence would therefore cause a slow response of protein levels to changes in photoperiod over  
several days, potentially matching the gradual change of photoperiod in natural environments.

The change in the phase of the circadian clock in response to changing photoperiods is a dynamic property  
termed 'dusk sensitivity' (Edwards et al., 2010). The circadian clock in *Arabidopsis* primarily tracks dawn  
410 across photoperiods (it has low dusk sensitivity, as in Fig. 4, see also Flis et al., 2016). Thus *Arabidopsis*  
rhythms have a consistent phase of entrainment, relative to dawn, across a wide range of photoperiods  
(Edwards et al., 2010; Flis et al., 2016). However, circadian clocks in other species track dusk (e.g. *Ipomoea*  
*nil*; Heide et al., 1988) or show an intermediate behaviour (e.g. 'noon-tracking' clocks, as in *Neurospora*  
*crassa*; Tan et al., 2004). These distinct circadian behaviours are illustrated in Fig EV9 for a transcript that  
415 peaks at dusk in 12/12 light/dark conditions. Clocks with these properties are predicted to alter the protein  
response to photoperiod. A dawn-tracking clock allows up-regulation of a protein with a dusk-peaking  
transcript under long photoperiods, as in *Arabidopsis*, whereas a noon-tracking clock yields photoperiod-  
insensitivity, and a dusk-tracking clock yields down-regulation of protein levels with increasing photoperiod.

The pre-conditions for translational coincidence are present in a wide variety of phototrophic organisms,  
420 suggesting that this mechanism might affect protein levels very broadly. However, the translational  
coincidence mechanism is flexible. The details of the photoperiod response can be tuned by the rhythmic  
expression profile of individual RNAs, by the light-sensitivity of the translation rate, and globally by the dusk  
sensitivity of the circadian clock.

## Discussion

425 While specific aspects of plant development, physiology, and metabolism have been demonstrated to  
respond to changes in photoperiod, a broader view has been lacking. Here, we quantified the response of  
the *Arabidopsis* proteome to photoperiod. This revealed several processes that are regulated by  
photoperiod, ranging from photosynthesis and primary metabolism to secondary metabolism and growth.  
Furthermore, we make a new, mechanistic link from the light-dependence of protein synthesis and  
430 rhythmic transcript regulation to the observed responses of protein abundance to photoperiod. This has  
implications for our understanding of photoperiod responses in plants and other phototrophic species.  
Translational coincidence can explain how plants adjust their proteome to prevailing photoperiods,  
optimizing their metabolism and growth. Widespread circadian regulation of RNAs might provide a  
selective advantage by this mechanism, even if their cognate proteins are too stable to show daily rhythms.

435

## Coordinated changes in response to photoperiod

Our quantitative analysis of 4344 Arabidopsis proteins in different photoperiods revealed highly coordinated changes in the abundance of proteins across a wide range of metabolic pathways. Proteins with related functions not only tend to change in abundance in the same direction but also within very narrow FC windows. A previous study using the same plant material as in our work reported here showed that plants in the 18-h photoperiod differ strongly in their phenotype and metabolic state compared to shorter photoperiods, including changes in leaf morphology, pattern of starch accumulation and degradation, and carbon-conversion efficiency (Sulpice et al., 2014). In general, plant growth in long photoperiods is no longer carbon-limited (Baerenfaller et al., 2015). Changes in protein abundance are mostly gradual between photoperiods, although some proteins have abrupt increases or decreases in abundance between neighbouring photoperiods. Together, the proteome changes not only across the photoperiod range where growth is increasing in response to an increasing fixed carbon supply but also in the range where the fixed carbon supply exceeds the requirement for growth. Similarly, the end of night and end of day transcriptomes show progressive changes across the entire range from a 4-h to an 18-h photoperiod (Flis et al., 2016).

Several metabolic pathways in plants are preferentially active during the light or the dark period. The proteome in different photoperiods reflects the adjustment to the increasing ratio between the light and dark phase of the diurnal cycle in longer photoperiods. Longer photoperiods show a concerted down-regulation of metabolic pathways that are predominantly active in the light including fatty acid biosynthesis, the MEP pathway and chlorophyll biosynthesis (Bao et al., 2000; Eckhardt et al., 2004; MongéLard et al., 2011). In contrast, enzymes involved in fatty acid degradation were more abundant in longer photoperiods. Similar to other oxidative processes, the degradation of fatty acids requires NAD<sup>+</sup>. Considering the rapid formation of NADPH in photosynthesis and rapid conversion of NAD<sup>+</sup> to NADH during photorespiration, it is plausible that fatty acid oxidation occurs preferentially in the dark. Plants might therefore up-regulate fatty acid degrading enzymes in longer photoperiods to compensate for the shorter dark period with an increased flux through this pathway.

Ribosomes are among the most abundant protein complexes of a plant cell. In Arabidopsis, higher protein synthesis rates were observed during in the light compared to the dark period (Ishihara et al., 2015; Juntawong and Bailey-Serres, 2012; Liu et al., 2012; Missra et al., 2015; Pal et al., 2013; Piques et al., 2009). This might reflect a strategy for optimal use of fixed carbon, since protein synthesis during the night requires sequestration of fixed carbon during the day, which entails additional energetic costs (Pal et al., 2013). More fixed carbon is available for metabolism in long photoperiods than short photoperiods. In agreement, polysome loading was decreased in the dark compared to the light period in short photoperiods. This difference became progressively smaller as the photoperiod was lengthened and polysome loading was similar in the day and the night in long photoperiods (Sulpice et al., 2014). This reflects the higher rates of starch degradation and higher levels of sugars during the night in long compared to short photoperiods. Hence, in longer photoperiods, plants can use their translational machinery over a longer period of time per diurnal cycle and a lower translation capacity might be sufficient to establish and maintain the proteome of each cell. A decrease in ribosomal protein abundance was also observed across leaf development (Baerenfaller et al., 2012). Mature leaves require their translational machinery mainly for maintenance while young leaves have to fully establish their proteome and might therefore need a higher capacity for protein synthesis. In both scenarios, the change in photoperiod length and leaf development, the down regulation of ribosome abundance may reflect an optimised use of energy, nitrogen and carbon resources required to establish and maintain a set of highly abundant proteins.

480 Interestingly, both RPS6 isoforms that are essential for the 40S ribosomal subunit (Creff et al., 2010) were  
up regulated in longer photoperiods. These proteins integrate the recruitment of tRNA and translation  
initiation factors to mRNA and thereby regulate translation. Moreover, RPS6 is a highly-conserved target of  
TOR kinase and thus may integrate signals of the nutritional and light energy status with the regulation of  
485 growth and life span in Arabidopsis plants (Ren et al., 2012). The photoperiod-dependent increase in RPS6  
abundance in the context of general down-regulation of the translational machinery indicates that bulk  
translation capacity is complemented by yet unknown processes to modulate protein synthesis in different  
photoperiods.

Other changes in protein abundance between photoperiods cannot be attributed to a longer or shorter  
window of activity of specific pathways, but reflect a re-programming of plant metabolism to optimize the  
490 efficiency of carbon use. For example, orchestrated up-regulation of sugar- and starch-related enzymatic  
pathways indicates that plants in longer photoperiods have a highly active primary carbon metabolism,  
including a higher capacity for starch degradation. There is an increase in abundance for many proteins in  
electron transport, the Calvin-Benson cycle, sucrose and starch synthesis, and the TCA cycle, indicating a  
higher capacity for carbon assimilation and use. The increase in starch degradation and TCA cycle enzymes  
495 could support increased fluxes in respiration metabolism to provide energy and reducing equivalents for  
biosynthetic reactions and sugar intermediates for rapid growth. Moreover, the strong up-regulation of  
sucrose export proteins in longer photoperiods, including the SWEET12 protein, indicates that source  
leaves might have an increased capacity for sucrose export to support growth in sink organs. Compared to  
short photoperiods, in long photoperiods plants synthesize less starch and therefore export sucrose more  
500 rapidly in the light period, while they degrade starch and export sucrose more rapidly during the night  
(Sulpice et al., 2014). This is consistent with the increased abundance of many proteins in the starch  
degradation pathway in long photoperiods. The low abundance of these proteins in short photoperiods  
would be expected to restrict the rate of starch degradation when starch must be conserved until dawn  
(Baerenfaller et al., 2015; Sulpice et al., 2014).

505 Consistent with the general up-regulation of enzymes in primary carbon metabolism, sucrose, sucrose-6-  
phosphate and glucose-6-phosphate levels increase with photoperiod length (Sulpice et al., 2014). This links  
primary carbon metabolism to the synthesis of sulphur-containing and defence-related glucosinolates,  
which is positively regulated by sugars on the transcript level (Flis et al., 2016; Gigolashvili et al., 2007; Guo  
et al., 2013; Miao et al., 2013). We found that the enzymes in the glucosinolate pathway accumulated to  
510 higher levels in longer photoperiods. The levels of these enzymes also increase during leaf development  
(Baerenfaller et al., 2015, 2012). In both scenarios – increased photoperiod length and later stages of leaf  
development – plants invest more resources into the synthesis of defense-related compounds when  
available energy and assimilated carbon are less restricted (del Carmen Martínez-Ballesta et al., 2013).  
Similarly, the increased levels of isoprenoid biosynthesis enzymes in the MVA pathway similarly supports  
515 increased synthesis of defense-related terpenoids in longer photoperiods (Vranová et al., 2013).

Several photoperiod-dependent changes in protein abundance could alter protein complex composition  
rather than affecting the regulation of entire enzymatic pathways. AGPase, which catalyzes the first  
committed and rate-limiting step of starch synthesis, represents such an example. The AGPase complex  
integrates signals of cellular carbon metabolism, thereby regulating the partitioning between carbon  
520 storage, export and utilisation (Orzechowski, 2008). The heterotetrameric complex of two large APL1 and  
two small APS1 subunits is responsible for 95% of the AGPase activity in the Arabidopsis rosette (Wang et  
al., 1997). APL1 abundance is decreased and APL3 increased in longer photoperiods while APS1 subunits  
were unchanged, indicating that APL3 might at least partially substitute APL1 in the AGPase complex in  
longer photoperiods. APL3 can be induced by exogenous provision of sugars and functionally complements

525 APL1-deficient mutants, suggesting that APL1 and APL3 confer different regulatory properties to the AGPase complex (Fritzius, 2001; Wingler et al., 2000).

The PSII supercomplex in the photosynthesis electron transport chain is another example of photoperiod-dependent changes in complex composition. We observed a general increase in abundance for components of all electron transport chain complexes, including PSII, in longer photoperiods. In line with reports  
530 showing that the minor light harvesting antenna CP29 is present in a 1:1 ration to the PSII core complex independent of the light conditions (Ballottari et al., 2007; Bielczynski et al., 2016), we found that two CP29 isoforms (LHCB4.1 and LHCB4.3) were also up regulated. However, several isoforms of the major PSII LHCB4 antenna complex decreased in abundance. This could indicate a shift in stoichiometry between core  
535 proteins and the LHCB4 antenna in the PSII supercomplex. Such shifts in stoichiometry were observed in Arabidopsis during acclimation to different light intensities (Bielczynski et al., 2016). Under natural light regimes, a longer photoperiod at a given geographical location is likely to be associated with higher peak light intensities. This might provide an explanation for the trend to increased electron transport capacity but decreased light antennae in long photoperiod-grown plants, as well as the trend to increased  
540 abundance of proteins in the downstream reactions in photosynthetic carbon metabolism. However, LHCB4 proteins can also be present as monomers in the thylakoid membrane and this PSII-independent fraction was shown to change during light acclimation (Bielczynski et al., 2016; Wientjes et al., 2013). Thus, a decrease in the abundance of the monomeric LHCB4 fraction could also explain the diametrical change in abundance we observed between LHCB4 and PSII core proteins in longer photoperiods.

### **Translational regulation contributes to protein responses to photoperiod**

545 Rates of protein synthesis are typically higher in the light, when they are driven by the energy and fixed carbon generated by photosynthesis, than in the dark when they rely on the mobilisation of fixed carbon reserves. Transcripts that peak early during the clock cycle will be efficiently translated in both short and long photoperiods. In contrast, transcripts that peak in the middle of the clock cycle will be efficiently  
550 translated in long photoperiod but not in short photoperiods. We term this mechanism of photoperiod response ‘translational coincidence’, and analysis of our proteomics dataset demonstrates its role in mediating photoperiod responses in Arabidopsis.

The action of light on translation is probably indirect. In the plastid, where up to half of the protein synthesis occurs in a leaf, the provision of energy and especially ATP by photosynthesis may underlie the strong light dependence of protein synthesis (Marín-Navarro et al., 2007; Pal et al., 2013). In the cytosol, it  
555 is less clear that light impacts directly on the energy status, which in the dark is also maintained at a high level by oxidative phosphorylation (Gardeström and Wigge, 1988; Stitt et al., 1982; see Stitt et al., 2010 for a review). Stimulation of cytosolic protein synthesis in the light may be due to the rise in sugar levels (Pal et al., 2013). Therefore, it can be questioned if translational coincidence will be robust against fluctuations in light intensity that affect the rate of photosynthesis and the supply of energy and carbon in the light. While  
560 more analyses is required to establish this, it is likely to be robust because a decreased rate of photosynthesis in low light affects not only sucrose synthesis but also starch accumulation and the carbon status in the following night, during which remobilisation of starch is required for maintenance and repair (Pilkington et al., 2015). Thus, while low light will decrease protein synthesis in the light, it is likely to result in an even greater decrease of the low rate in the following night. Further, as the photoperiod lengthens,  
565 the increasing rate of starch degradation allows higher levels of sugars to be maintained at night, which could support increased polysome loading during the night (Sulpice et al., 2014). This trend will reinforce the proposed translational coincidence mechanism; translation of transcripts that peak in the middle of the circadian cycle it will be strongly restricted in short photoperiods, whereas they may still be translated at relatively high rates even after dusk in long photoperiods.

570

## The circadian clock tunes protein responses to photoperiod

The role of the circadian clock in mediating photoperiodic changes in protein expression suggests an explanation for a longstanding paradox. Diel rhythms in transcript level often do not lead to diel rhythms in protein level (Baerenfaller et al., 2012; Choudhary et al., 2016; Gibon et al., 2004; Lu, 2005). Therefore, 575 what is the physiological significance of the pervasive, rhythmic transcript regulation, if any? For unstable proteins, diel rhythms in transcript level might indeed increase protein levels at the time of day when the protein is most needed, an effect that might be amplified by temporal coordination of an entire pathway (Harmer et al., 2000). Alternatively, the functional properties of stable proteins that are newly-synthesised (when RNA levels are high) might differ from the existing bulk pool (Busheva et al., 1991), though this 580 seems unlikely to be a general case. The translational coincidence mechanism suggests that diel RNA rhythms might tune the levels of many proteins on a seasonal timescale, rather than within a single day.

It is an open question whether the photoperiod responses we observe are adaptive for these different conditions, or are merely a tolerated consequence of growth in different photoperiods. However, as indicated above, the changes in abundance of proteins involved in carbon metabolism, secondary 585 metabolism and the translational machinery certainly have the potential to contribute to the change in metabolite levels and fluxes in different photoperiods. A similar interplay of clock and translation may also be relevant in other systems where protein levels do not change significantly over the course of a day. For example, macromolecule biosynthesis exhibits a strong diel rhythm in the mouse liver (Atger et al., 2015), though the proteome shows only weak diel rhythms (Mauvoisin et al., 2014). Similar questions have arisen 590 in the study of microbial organisms, in which changes in protein synthesis rates also have widespread effects. For example, changes in ribosome loading at higher growth rates are known to affect the proteome composition in *Bacillus subtilis* (Borkowski et al., 2016).

## Translational coincidence as a general mechanism of photoperiodic regulation

595 Changes in photoperiod place significant demands on plant physiology and growth. Given that the demands of growth in varying photoperiods are likely to be similar for plant species, we might expect similar changes in proteome expression in these species, especially in core processes such as primary metabolism. However, *Arabidopsis* in the laboratory can grow in photoperiods as short as 3 h (Piques et al., 2009) and in the field different accessions are found across an especially large range of latitudes, ranging from the north 600 of Scandinavia to the Cape Verde Islands (Koornneef et al., 2004), from a possible origin in Africa (Durvasula et al., 2017). Thus, *Arabidopsis* may be especially suited to respond to the prevailing photoperiod.

Besides identifying photoperiod-sensitive processes that may be general to plant life, we have also identified a general mechanism of response to photoperiod, termed translational coincidence. The requirements for translational coincidence are simple – light-stimulated translation, and circadian 605 regulation of transcription. As illustrated by several examples, these are general properties of phototrophic life. If other temporally-restricted factors regulate translation, rather than light, then translational coincidence might occur in further taxa.

## Materials and Methods

### 610 Plant Material and Growth Conditions

The same plant material used for transcriptome analysis in (Flis et al., 2016) was the basis of our proteome study. Briefly, *Arabidopsis thaliana* Col-0 plants were grown on GS 90 soil mixed in a ratio 2:1 (v/v) with vermiculite. Plants were grown for 1 week in a 16 h light ( $250 \mu\text{mol m}^{-2} \text{s}^{-1}$ , 20 °C)/8 h dark (6 °C) regime followed by an 8 h light ( $160 \mu\text{mol m}^{-2} \text{s}^{-1}$ , 20 °C)/16 h dark (16 °C) regime for one week. Plants were then replanted with five seedlings per pot, transferred for 1 week to growth cabinets with an 8 h photoperiod ( $160 \mu\text{mol m}^{-2} \text{s}^{-1}$ , 20 °C throughout the day/night cycle) and then distributed into small growth cabinets with an 18, 12, 8 or 6 h photoperiod ( $160 \mu\text{mol m}^{-2} \text{s}^{-1}$  and 20/18 °C in the day/night). This growth protocol was used to decrease differences in size between plants at the time of harvest, and to prevent an early transition to flowering that would otherwise occur if plants were grown from germination in long photoperiods. Plant material was harvested 9 days after transfer, at the end of the day (end-of-day samples were taken prior to lights switching off). Plant material was homogenized using a Ball-Mill (Retch, Germany). Approximately 50 mg of material per sample was aliquoted into 2 mL Eppendorf tubes while frozen and distributed for analysis to consortium partners in three biological and two technical replicates.

### Protein Extraction and Digestion

625 Frozen plant material was suspended in 100  $\mu\text{L}$  SDS extraction medium (4% w/v SDS, 40 mM Tris, 60  $\mu\text{L ml}^{-1}$  protease inhibitor cocktail (Roche)) and mixed vigorously. The extract was cleared by centrifuged for 10 min at 16,000 g followed by ultracentrifugation at 100,000 g for 45 min. The resulting supernatant was diluted 4:1 (v/v) in Laemmli sample buffer and incubated at 65 °C for 5 min. For each sample, 400  $\mu\text{g}$  protein was subjected to electrophoresis overnight on a 10% SDS-polyacrylamide gel at 60 V. Samples were loaded randomized on the gels to minimize positional effects. Gels were stained in Coomassie Blue solution (20% v/v methanol, 10% v/v acetic acid, 0.1% m/v Coomassie Brilliant Blue R) for 45 min then de-stained twice in 10% v/v methanol, 5% v/v acetic acid for 1 h at room temperature. Each lane of the gel was cut into 7 fractions and transferred to a 96-deep well plate. Gel pieces were fully de-stained by three rounds of 50% v/v methanol, 100 mM ammonium bicarbonate, incubating each time for 1 h at 37 °C. In-gel digestion of proteins using trypsin was performed as previously reported (Shevchenko et al., 1996). Volumes of solutions were adjusted to ensure that the gel pieces were fully covered during the reduction, alkylation and washing steps. Following in-gel tryptic digestion peptides were purified by reversed-phase chromatography on Finisterre C18 SPE columns (Teknokroma, Barcelona, Spain) and dried in a vacuum centrifuge at 45 °C.

### 640 Mass Spectrometry Analysis

Peptides were re-suspended in 40  $\mu\text{L}$  3% v/v acetonitrile, 0.1% v/v formic acid. Measurements were performed on a LTQ-Orbitrap Velos (Thermo Scientific) coupled with a NanoLC 1D HPLC (Eksigent). Samples were loaded onto a laboratory-made capillary column (9 cm long, 75  $\mu\text{m}$  inner diameter), packed with Magic C18 AQ beads (3  $\mu\text{m}$ , 100 Å, Microm) and eluted with a 5% to 40% v/v acetonitrile concentration gradient over 70 min, followed by 80% v/v acetonitrile for 10 min, at a flow rate of 0.25  $\mu\text{L min}^{-1}$ . Peptide ions were detected in a full MS1 scan for mass-to-charge ratios between 300 and 2000. MS2 scans were performed for the ten peptides with the highest MS signal (minimal signal strength 500 hits, isolation width mass-to-charge ratio 3 m/z, relative collision energy 35%). Peptide masses for which MS/MS spectra had been recorded were excluded from further MS/MS scans for 30 seconds.

650



## Peak Area Based Protein Quantification and Statistical Analysis

Quantitative analysis of MS/MS measurements was performed with Progenesis LCMS software (Nonlinear Dynamics). One run was selected as a reference and for each run 15 vectors were placed manually on prominent peaks before applying the automatic alignment and peak picking functions of Progenesis. Normalization factors across all samples ranged between 0.7 and 1.4. The best eight spectra for each MS1 signal peak were exported to Mascot. Mascot search parameters were set as follows: Arabidopsis TAIR10 genome annotation, requirement for tryptic ends, one missed cleavage allowed, fixed modification: carbamidomethylation (cysteine), variable modification: oxidation (methionine), peptide mass tolerance =  $\pm$  10 ppm, MS/MS tolerance =  $\pm$  0.6 Da, allowed peptide charges of +2 and +3. Spectra were also searched against a decoy database of the Arabidopsis proteome and results were filtered to ensure a FDR below 1 % on the protein level. Additionally, peptide identifications with a Mascot score below 25 were excluded. Mascot results were imported into Progenesis, quantitative peak area information extracted and the results exported for data plotting and statistical analysis. Mass spectrometry data used for quantification can be found on the EMBL proteomic repository PRoteomics IDentifications (PRIDE; accession: PXD006848, doi: 10.6019/PXD006848). This analysis was performed in R (version 3.2.3; R Core Team, 2015).

Statistical analysis to identify significantly changing proteins was performed in R (version 3.2.3; R Core Team, 2015) using log<sub>2</sub>-transformed relative abundance values. First, analysis of variance (ANOVA) was performed across photoperiods. The resulting p-values were corrected for multiple testing with the Benjamini–Hochberg method to control the global FDR. Next, significant changes between photoperiods were computed by pairwise-comparison using the Tukey Honest Significant Differences (TukeyHSD) post-hoc test followed by correction with the Benjamini–Hochberg method. The results of this analysis for all proteins are presented in Table EV3.

Overrepresentation analysis of functional categories was performed using KEGG pathway annotations (Kanehisa et al., 2016) and gene ontology (GO) terms (Ashburner et al., 2000). Arabidopsis GO annotations were obtained from the Gene Ontology Consortium database (<http://www.geneontology.org>). Overrepresentation of GO terms and KEGG pathways was assessed using Fisher's exact test.

## Selection of arrhythmic transcripts

Reliably arrhythmic transcripts (i.e. transcripts with no detectable diurnal rhythm in transcript levels) were identified by applying a set of criteria based on available transcriptomic analysis from (Bläsing et al., 2005) and (Flis et al., 2016). Transcripts were identified as reliably arrhythmic if they were not in the set of diurnally rhythmic transcripts identified by ANOVA in (Bläsing et al., 2005), and if they had no significant difference between end of day and end of night expression in any of the 5 photoperiods examined by (Flis et al., 2016), as assessed by a two-tailed t-test at a p=0.05 threshold (Bonferroni corrected for multiple testing across 5 photoperiods).

## Mathematical model of translational coincidence

We consider a simple model with different rates of translation in the light ( $T_L$ ) and in the dark ( $T_D$ ). For arbitrary mRNA dynamics given by  $m(t)$ , the daily rate of protein synthesis is then:

$$k_s = T_L \int_{t=0}^{t_{dusk}} m(t) + T_D \int_{t=t_{dusk}}^{24} m(t)$$

For slowly turning-over proteins, protein abundance reaches a steady state where synthesis is balanced by turnover ( $k_d$ ) and dilution by growth ( $\mu$ ):

$$P = \frac{k_s}{k_d + \mu}$$

Quantitative proteomics measures abundance relative to an internal standard. We assume that this internal standard can be represented by the abundance of an ‘average’ protein with no transcript rhythm and a turnover rate of  $k_{d,reference}$  with its rate of synthesis given by:

$$k_{s,reference} = T_L t_{dusk} + T_D (24 - t_{dusk})$$

Its abundance is then given by:

$$P_{reference} = \frac{k_{s,reference}}{k_{d,reference} + \mu}$$

This represents the background changes in protein levels, against which changes in protein levels are normalised. Assuming that any given protein has a turnover similar to the background (i.e.  $k_d = k_{d,reference}$ ), we obtain the normalised value analogous to that measured by quantitative proteomics:

$$P_{normalised} = \frac{P}{P_{reference}} = \frac{T_L \int_{t=0}^{t_{dusk}} m(t) + T_D \int_{t=t_{dusk}}^{24} m(t)}{T_L t_{dusk} + T_D (24 - t_{dusk})}$$

For a relative rate of protein synthesis in the light compared to the dark of  $R (= T_L/T_D)$ , this becomes:

$$P_{normalised} = \frac{R \int_{t=0}^{t_{dusk}} m(t) + \int_{t=t_{dusk}}^{24} m(t)}{(R - 1)t_{dusk} + 24}$$

This expresses the protein level at a given photoperiod ( $t_{dusk}$ ) as a function of the measured transcript dynamics ( $m(t)$ ) and the measured ratio of protein synthesis in the light compared to the dark ( $R$ ). Based on  $^{13}\text{CO}_2$  labelling data, this ratio was estimated to have a value of 1.4 (Pal et al., 2013).

We note that differences in the rate of protein turnover ( $k_d$ ) between proteins will induce systematic deviations in this relationship. However, since there is no known systematic relationship between the timing of transcript expression and the rate of protein turnover, these systematic deviations are not expected to affect the relationship observed between transcript expression and photoperiod response.

Changes in protein level between two photoperiods are then compared relative to the mean abundance between those photoperiods:

$$\Delta P = \frac{(P_{normalised,2} - P_{normalised,1})}{((P_{normalised,1} + P_{normalised,2})/2)}$$

This gives the model predictions used in Fig 6E.

### Inference of protein synthesis and degradation rates in *Ostreococcus* and *Cyanothece*

Synthesis and degradation rates for *Ostreococcus* and *Cyanothece* proteins were calculated from the proteomics time-series datasets of (Martin et al., 2012) and (Aryal et al., 2011), respectively. These datasets characterised the dynamics of partial stable isotope incorporation with  $^{15}\text{N}$  (*Ostreococcus*) and heavy leucine (*Cyanothece*) during several days of growth in light/dark cycles. For each species, we inferred a labelling efficiency from the maximum labelled fraction achieved of any protein, which was equal to 0.93 for *Ostreococcus* and to 0.8 for *Cyanothece*. To infer degradation rates, we fitted a simple kinetic model assuming: (1) constant labelling efficiency over time; (2) different proteins are labelled at the same

725 efficiency; (3) heavy and light fractions are turned over at equal rates. To infer relative rates of synthesis in the light and dark, we took the average ratio of labelling rates between time-points spanning the light and dark periods.

## Acknowledgements

730 Research was supported by the European Union (FP7 collaborative project TiMet, contract no. 245143), by BBSRC award BB/D019621/1 to AJM, by ETH Zurich (Switzerland), and by the Max Planck Society (Germany).

## Author contributions

Designed research (DDS, AG, MS, AJM, WG); performed proteomic measurements (AG, KB), analysed data and prepared figures (AG, DDS); conceived and performed modelling (DDS); wrote the paper (DDS and AG with input from all authors).

## 735 Conflicts of interest

The authors declare no conflicts of interest.

## Figure legends

### Figure 1. Overview of photoperiod proteome dataset.

740 **A** Summary of sampling protocol. Samples were taken at the end of the day (arrows) from 30-day old plants grown for 9 days in photoperiods of 6, 8, 12, and 18h duration.

**B** Boxplot of coefficient of variation (CV) across three biological replicates for each photoperiod.

**C** Principal component analysis of proteomics dataset, showing % variance explained by each component. The three biological replicates from each photoperiod cluster together.

745 **D** Histogram of maximal fold changes (FC) across proteins identified as significantly changing with photoperiod ( $p < 0.05$ ).

### Figure 2. Enrichment of GO terms in fold change (FC) windows for proteins up- and down-regulated with increasing photoperiod.

**A** Five high-scoring GO enrichments of proteins are listed for each FC window.

750 **B** Heatmap of GO enrichments for each FC window for significantly upregulated proteins (enrichment scored by  $-\log_{10}(p\text{-value})$  of Fisher's exact test).

**C** As in **B**, for significantly downregulated proteins.

### Figure 3. Photoperiod modulates protein levels in processes and complexes involved in photosynthesis.

755 **A** Significantly up-regulated proteins in photosystem I and II: photosystem I subunits C, L, E, N, G, H (PSAC, PSAL, PSAE-1, PSAN, PSAG, PSAH-2), photosystem II subunits D, C, E, L, O1, O2 (PSBD, PSBC, PSBE, PSBL, PSBO1, PSBO2).

**B** Significantly up-regulated proteins in the electron transport chain: ferredoxin 1 (FD1) and ferredoxin-NADP-oxidoreductase 1 (FNR1).

760 **C** Significantly down-regulated proteins in the light harvesting complex: Chlorophyll a-b binding proteins 1, 2.1, 2.2, and 2.3 (CAB1, LHCB2.1, LHCB2.2, LHCB2.30).

**D** Significantly down-regulated proteins in chlorophyll biosynthesis, including enzymes involved in heme biosynthesis (glutamyl-tRNA reductase 1, HEMA1; delta-aminolevulinic acid dehydratase 1, HEMB1; uroporphyrinogen decarboxylase 2, HEME2), as well as tetrapyrrole-binding protein (GUN4), magnesium-chelatase (GUN5), and NADPH:protochlorophyllide oxidoreductases (PORB, PORC).

**Figure 4. Photoperiod modulates protein levels of enzymes involved in primary and secondary metabolism.**

- 770 **A** Significantly changing proteins involved in the partitioning of sugars to sucrose and starch during the day, including sucrose metabolism (sucrose-phosphate synthase, SPSA1, SPSC; bidirectional sugar transporter SWEET12; sucrose synthase, SUS1), ADP-Glc synthesis (glucose-1-phosphate adenylyltransferase small subunits, APS1, APS2), and starch synthesis (glucose-1-phosphate adenylyltransferase large subunits, APL1, APL3; phosphoglucomutase, PGM; starch synthase, SS1; 1,4-alpha-glucan-branching enzyme, SBE2.2).
- 775 **B** Significantly up-regulated proteins involved in metabolism of starch during the night, including starch degradation (phosphoglucan, water dikinase, PWD; phosphoglucan phosphatase, LSF1, LSF2; beta-amylase, BAM3; isoamylase, ISA3), and maltose metabolism (4-alpha-glucanotransferase, DPE2; alpha-glucan phosphorylase, PHS2).
- 780 **C** Significantly down-regulated proteins in sulfate metabolism. Includes 5'-adenylylsulfate reductases (APR2, APR3), cysteine synthases (ACS1, DES1, CS26, CYSD2), methionine aminotransferase (BCAT4), methylthioalkylmalate synthase (MAM1), and cytosolic sulfotransferases (SOT17, SOT18).

**Figure 5. Expected effects of the changing coincidence of protein synthesis with transcript.**

- 785 Light maintains high rates of protein synthesis in longer photoperiods (top panels), which is expected to be without consequence for protein synthesis from dawn-phased transcripts (center panels) but results in a boost of protein synthesis from transcripts expressed late in the day (bottom panels).

**Figure 6. Evaluating circadian control of protein changes with photoperiod.**

- 790 **A** Schematic of the data integration, relating quantitative transcript and protein synthesis measurements to quantitative proteomics measurements.
- B** Phase enrichment of proteins identified as significantly up- and downregulated in long photoperiods, evaluated by Fisher's Exact Test, with transcripts grouped by phase in two-hour intervals.
- C** Change in protein level between short (6h) and long (18h) photoperiods (LPP-SPP), grouped according to the peak phase of transcript expression.
- D** Schematic of a simple model of protein synthesis, using measured mRNA (m) and protein (p) input data.
- 795 **E** Comparison of model to data, for changes between 6h and 18h photoperiods (LPP-SPP) for the 251 proteins with rhythms in RNA abundance with amplitude >1.7. Changes are plotted as differences between photoperiods, normalised to the mean. The dashed line indicates the case where model predictions match measured values. The solid line indicates the linear fit to the plotted data.

800 **Figure 7. Ingredients of translational coincidence in diverse photoautotrophic organisms.**

- A** Light-stimulated protein synthesis. Relative rates of protein synthesis in the light compared to the dark have been reported in Arabidopsis (Pal et al., 2013), and were inferred from quantitative proteomics stable isotope labelling datasets for *Ostreococcus* (Martin et al., 2012) and *Cyanothece* (Aryal et al., 2011) (see Materials and Methods for details).
- 805 **B** Slow rates of protein turnover. The dashed line represents a half-life of 1 day. Protein degradation rates have been reported for Arabidopsis (Li et al., 2017), and were inferred from quantitative proteomics data for *Ostreococcus* and *Cyanothece*, as in (A) (see Materials and Methods for details).
- C** Diurnal and circadian dynamics in gene expression. Shaded areas represent the fraction of the transcriptome estimated to be dynamic in circadian (top row) and diurnal (bottom row) conditions.

810

## Expanded view figures and tables

### Figure EV1. Progressive changes in abundance across photoperiods for proteins exhibiting significant changes with photoperiod.

815 **A** Protein abundance across photoperiods for proteins which decrease in abundance in longer photoperiods. Protein abundance for each protein was mean-normalised.  
**B** As in **A**, for proteins which increase in abundance in longer photoperiods.

### Figure EV2. Coordinated changes in ribosome biogenesis and ribosomal components.

820 **A** Changes in protein levels for 19 proteins in the KEGG pathway for ribosome biogenesis that decrease in abundance with increasing photoperiod length, with each protein normalised to its own mean level across all four photoperiods.  
**B** As in **A**, for 85 proteins in the KEGG pathway for ribosomes that decrease in abundance with increasing photoperiod length.

### 825 Figure EV3. Comparison of transcriptome and proteome photoperiod datasets.

**A** Correlations between the photoperiod proteome data and transcripts identified as exhibiting significant changes across photoperiods. Fold changes across photoperiods in transcripts and proteins are compared. Changing transcripts were identified at both ED and EN time points (left- and right-hand panels, respectively), as described in Flis et al. (2016). Black dots indicate the direction of change was the same for both transcripts and proteins; red dots indicate the direction of change was different for transcripts and proteins. Transcript data are from samples taken from the same plants as were used for our proteomic analysis, and were described in Flis et al. (2016).  
830 **B** As in **A**, for a subset of reliably arrhythmic transcripts (see Materials and methods for the procedure used to identify arrhythmic transcripts).

835

### Figure EV4. Progressive changes in abundance across photoperiods for proteins with dawn and evening-phased transcripts.

**A** Protein abundance across photoperiods for proteins whose transcripts peak in expression between ZT0 and ZT2 in the microarray time course dataset of Bläsing et al. (2005). Protein abundance for each protein  
840 was mean-normalised.  
**B** As in **A**, for proteins whose transcripts peak between ZT12 and ZT14.

### Figure EV5. Protein response to photoperiod in an independent dataset.

845 **A** Changes in protein levels between 8h (SPP) and 16h (LPP) photoperiods, as measured in Baerenfaller et al. (2015), grouped according to the phase of peak transcript expression.  
**B** p-values of differences in protein levels for proteins across for leaf development stages (Baerenfaller et al., 2015) with evening-phased (ZT10 to ZT14, inclusive) and dawn-phased (ZT22 to ZT2, inclusive) transcripts (Bläsing et al., 2005), as calculated by Mann-Whitney U test (note that in all cases the mean of the change from SPP to LPP was higher for the evening-phased group than the dawn-phased groups, as  
850 expected).

### Figure EV6. Comparison of core clock transcript expression in different conditions.

855 Timeseries microarray data are plotted from experiments conducted in continuous light (Covington and Harmer, 2007) and 12L:12D light:dark cycles (Bläsing et al., 2005), along with pseudo-time series data from combined EN and ED samples across 4, 6, 8, 12, and 18h photoperiods (Flis et al., 2016).

**Figure EV7. Protein regulation with photoperiod after filtering for transcriptional regulation.**

**A** Protein changes between 6h (SPP) and 18h photoperiods (LPP), grouped by phase of peak expression, are shown for all 547 proteins with rhythmic transcripts.

860 **B** As in **A**, for the subset of 341 transcripts without changing levels across photoperiods, as judged by a comparison with the photoperiod microarray dataset of Flis et al. (2016) (see text for details).

**C** As in **A**, for the subset of 142 transcripts predominantly controlled by the circadian clock, as judged by a comparison with the circadian microarray dataset of Covington and Harmer (2007) (see text for details).

**D** As in **A**, for the 125 transcripts in the intersection of the subsets shown in **B** and **C**.

865

**Figure EV8. Illustrative examples of photoperiod responses by translational coincidence.**

**A, B** Gene expression for dawn-phased genes (GUN4, GUN5) are shown in **A** and evening-phased genes (PHS2, ISA3) are shown in **B** in multiple conditions, as measured by microarray. Time series data from experiments conducted in continuous light (Covington and Harmer, 2007) and 12L:12D light:dark cycles (Bläsing et al., 2005), along with pseudo-time series data from combined EN and ED samples across 4, 6, 8,

870

(Bläsing et al., 2005), along with pseudo-time series data from combined EN and ED samples across 4, 6, 8, 12, and 18h photoperiods (Flis et al., 2016). Data was mean-normalised.

**C, D** Protein abundance across photoperiods for transcripts quantified in **A** and **B**, as quantified by mass spectrometry (this study). Error bars denote standard error of the mean.

875 **Figure EV9. Simulation of how clock responses affect the protein response to photoperiod.**

**A - C** Clock-regulated transcript dynamics for a dawn-tracking (**A**), noon-tracking (**B**), and dusk-tracking (**C**) clock across three photoperiods. In each case, the transcript is expressed at ZT12 (i.e. dusk) in a 12h photoperiod.

**D - F** Protein responses to photoperiod for the protein encoded by the transcript shown in **A - C**.

880

**Table EV1. Quantitative proteomics dataset.** Mean and standard deviation of all measured proteins in each photoperiod.

**Table EV2. KEGG pathway coverage.** Comparison of coverage of KEGG pathways in this dataset (PP),

885

compared to the dataset of (Baerenfaller et al., 2012).

**Table EV3. Statistical analysis of protein changes across photoperiods.**

**Table EV4. Summary of the number of significant changes at different FC thresholds.**

890

**Table EV5. KEGG pathway enrichment.** Overrepresentation of KEGG terms was analysed in proteins showing significant up or down regulation over photoperiods.

**Table EV6. GO enrichment by FC window.** Overrepresentation of GO terms was analysed in proteins showing significant up down regulation over photoperiods, stratified by FC windows.

895

**Table EV7. GO term enrichment of transcript-protein pairs.**

## Data citations

Quantitative proteomics data: PRIDE; accession: PXD006848, doi: 10.6019/PXD006848

## 900 References

- Aryal, U.K., Stöckel, J., Krovvidi, R.K., Gritsenko, M.A., Monroe, M.E., Moore, R.J., Koppelaar, D.W., Smith, R.D., Pakrasi, H.B., Jacobs, J.M., 2011. Dynamic proteomic profiling of a unicellular cyanobacterium *Cyanothece* ATCC51142 across light-dark diurnal cycles. *BMC Syst. Biol.* 5, 194. doi:10.1186/1752-0509-5-194
- Ashburner, M., Ball, C.A., Blake, J.A., Botstein, D., Butler, H., Cherry, J.M., Davis, A.P., Dolinski, K., Dwight, S.S., Eppig, J.T., Harris, M.A., Hill, D.P., Issel-Tarver, L., Kasarskis, A., Lewis, S., Matese, J.C., Richardson, J.E., Ringwald, M., Rubin, G.M., Sherlock, G., 2000. Gene Ontology: tool for the unification of biology. *Nat. Genet.* 25, 25–29. doi:10.1038/75556
- Ashworth, J., Coesel, S., Lee, A., Armbrust, E.V., Orellana, M.V., Baliga, N.S., 2013. Genome-wide diel growth state transitions in the diatom *Thalassiosira pseudonana*. *Proc. Natl. Acad. Sci.* 110, 7518–7523. doi:10.1073/pnas.1300962110
- Atger, F., Gobet, C., Marquis, J., Martin, E., Wang, J., Weger, B., Lefebvre, G., Descombes, P., Naef, F., Gachon, F., 2015. Circadian and feeding rhythms differentially affect rhythmic mRNA transcription and translation in mouse liver. *Proc. Natl. Acad. Sci. U. S. A.* 112, E6579–6588. doi:10.1073/pnas.1515308112
- Baerenfaller, K., Massonnet, C., Hennig, L., Russenberger, D., Sulpice, R., Walsh, S., Stitt, M., Granier, C., Grisse, W., 2015. A long photoperiod relaxes energy management in *Arabidopsis* leaf six. *Curr. Plant Biol.* 2, 34–45. doi:10.1016/j.cpb.2015.07.001
- Baerenfaller, K., Massonnet, C., Walsh, S., Baginsky, S., Bühlmann, P., Hennig, L., Hirsch-Hoffmann, M., Howell, K.A., Kahlau, S., Radziejowski, A., Russenberger, D., Rutishauser, D., Small, I., Stekhoven, D., Sulpice, R., Svozil, J., Wuyts, N., Stitt, M., Hilson, P., Granier, C., Grisse, W., 2012. Systems-based analysis of *Arabidopsis* leaf growth reveals adaptation to water deficit. *Mol. Syst. Biol.* 8, 606. doi:10.1038/msb.2012.39
- Ballottari, M., Dall'Osto, L., Morosinotto, T., Bassi, R., 2007. Contrasting behavior of higher plant photosystem I and II antenna systems during acclimation. *J. Biol. Chem.* 282, 8947–8958. doi:10.1074/jbc.M606417200
- Bao, X., Focke, M., Pollard, M., Ohlrogge, J., 2000. Understanding in vivo carbon precursor supply for fatty acid synthesis in leaf tissue. *Plant J. Cell Mol. Biol.* 22, 39–50.
- Bielczynski, L.W., Schansker, G., Croce, R., 2016. Effect of Light Acclimation on the Organization of Photosystem II Super- and Sub-Complexes in *Arabidopsis thaliana*. *Front. Plant Sci.* 7. doi:10.3389/fpls.2016.00105
- Bläsing, O.E., Gibon, Y., Günther, M., Höhne, M., Morcuende, R., Osuna, D., Thimm, O., Usadel, B., Scheible, W.-R., Stitt, M., 2005. Sugars and Circadian Regulation Make Major Contributions to the Global Regulation of Diurnal Gene Expression in *Arabidopsis*. *Plant Cell* 17, 3257–3281. doi:10.1105/tpc.105.035261
- Borkowski, O., Goelzer, A., Schaffer, M., Calabre, M., Mäder, U., Aymerich, S., Jules, M., Fromion, V., 2016. Translation elicits a growth rate-dependent, genome-wide, differential protein production in *Bacillus subtilis*. *Mol. Syst. Biol.* 12, n/a-n/a. doi:10.15252/msb.20156608
- Busheva, M., Garab, G., Liker, E., Tóth, Z., Széll, M., Nagy, F., 1991. Diurnal Fluctuations in the Content and Functional Properties of the Light Harvesting Chlorophyll a/b Complex in Thylakoid Membranes : Correlation with the Diurnal Rhythm of the mRNA Level. *Plant Physiol.* 95, 997–1003.
- Choudhary, M.K., Nomura, Y., Shi, H., Nakagami, H. and Somers, D.E., 2016. Circadian profiling of the *Arabidopsis* proteome using 2D-DIGE. *Frontiers in plant science*, 7. doi: 10.3389/fpls.2016.01007
- Covington, M.F., Harmer, S.L., 2007. The circadian clock regulates auxin signaling and responses in *Arabidopsis*. *PLoS Biol.* 5, e222. doi:10.1371/journal.pbio.0050222
- Covington, M.F., Maloof, J.N., Straume, M., Kay, S.A., Harmer, S.L., 2008. Global transcriptome analysis reveals circadian regulation of key pathways in plant growth and development. *Genome Biol.* 9, R130. doi:10.1186/gb-2008-9-8-r130

- Creff, A., Sormani, R., Desnos, T., 2010. The two Arabidopsis RPS6 genes, encoding for cytoplasmic ribosomal proteins S6, are functionally equivalent. *Plant Mol. Biol.* 73, 533–546. doi:10.1007/s11103-010-9639-y
- Dardente, H., Hazlerigg, D.G., Ebling, F.J.P., 2014. Thyroid Hormone and Seasonal Rhythmicity. *Front. Endocrinol.* 5. doi:10.3389/fendo.2014.00019
- del Carmen Martínez-Ballesta, M., Moreno, D.A., Carvajal, M., 2013. The Physiological Importance of Glucosinolates on Plant Response to Abiotic Stress in Brassica. *Int. J. Mol. Sci.* 14, 11607–11625. doi:10.3390/ijms140611607
- Durvasula, A., Fulgione, A., Gutaker, R.M., Alacakaptan, S.I., Flood, P.J., Neto, C., Tsuchimatsu, T., Burbano, H.A., Pic?, F.X., Alonso-Blanco, C., Hancock, A.M., 2017. African genomes illuminate the early history and transition to selfing in *Arabidopsis thaliana*. *Proc. Natl. Acad. Sci.* 114, 5213–5218. doi:10.1073/pnas.1616736114
- Eckhardt, U., Grimm, B., Hörtensteiner, S., 2004. Recent advances in chlorophyll biosynthesis and breakdown in higher plants. *Plant Mol. Biol.* 56, 1–14. doi:10.1007/s11103-004-2331-3
- Edwards, K.D., 2006. FLOWERING LOCUS C Mediates Natural Variation in the High-Temperature Response of the Arabidopsis Circadian Clock. *PLANT CELL ONLINE* 18, 639–650. doi:10.1105/tpc.105.038315
- Edwards, K.D., Akman, O.E., Knox, K., Lumsden, P.J., Thomson, A.W., Brown, P.E., Pokhilko, A., Kozma-Bognar, L., Nagy, F., Rand, D.A., Millar, A.J., 2010. Quantitative analysis of regulatory flexibility under changing environmental conditions. *Mol. Syst. Biol.* 6. doi:10.1038/msb.2010.81
- Fernie, A.R., Roessner, U., Trethewey, R.N., Willmitzer, L., 2001. The contribution of plastidial phosphoglucomutase to the control of starch synthesis within the potato tuber. *Planta* 213, 418–426. doi:10.1007/s004250100521
- Flis, A., Sulpice, R., Seaton, D.D., Ivakov, A.A., Liput, M., Abel, C., Millar, A.J., Stitt, M., 2016. Photoperiod-dependent changes in the phase of core clock transcripts and global transcriptional outputs at dawn and dusk in Arabidopsis. *Plant Cell Environ.* 39, 1955–1981. doi:10.1111/pce.12754
- Fritzius, T., 2001. Induction of ApL3 Expression by Trehalose Complements the Starch-Deficient Arabidopsis Mutant adg2-1 Lacking ApL1, the Large Subunit of ADP-Glucose Pyrophosphorylase. *PLANT Physiol.* 126, 883–889. doi:10.1104/pp.126.2.883
- Gardeström, P., Wigge, B., 1988. Influence of Photorespiration on ATP/ADP Ratios in the Chloroplasts, Mitochondria, and Cytosol, Studied by Rapid Fractionation of Barley (*Hordeum vulgare*) Protoplasts. *Plant Physiol.* 88, 69–76.
- Gibon, Y., Bläsing, O.E., Palacios-Rojas, N., Pankovic, D., Hendriks, J.H.M., Fisahn, J., Höhne, M., Günther, M., Stitt, M., 2004. Adjustment of diurnal starch turnover to short days: depletion of sugar during the night leads to a temporary inhibition of carbohydrate utilization, accumulation of sugars and post-translational activation of ADP-glucose pyrophosphorylase in the following light period. *Plant J.* 39, 847–862. doi:10.1111/j.1365-313X.2004.02173.x
- Gigolashvili, T., Yatushevich, R., Berger, B., Müller, C., Flügge, U.-I., 2007. The R2R3-MYB transcription factor HAG1/MYB28 is a regulator of methionine-derived glucosinolate biosynthesis in Arabidopsis thaliana. *Plant J. Cell Mol. Biol.* 51, 247–261. doi:10.1111/j.1365-313X.2007.03133.x
- Glover, H.E., Smith, A.E., 1988. Diel patterns of carbon incorporation into biochemical constituents of *Synechococcus* spp. and larger algae in the Northwest Atlantic Ocean. *Mar. Biol.* 97, 259–267. doi:10.1007/BF00391311
- Graf, A., Smith, A.M., 2011. Starch and the clock: the dark side of plant productivity. *Trends Plant Sci.* 16, 169–175. doi:10.1016/j.tplants.2010.12.003
- Guerreiro, A.C.L., Benevento, M., Lehmann, R., van Breukelen, B., Post, H., Giansanti, P., Maarten Altelaar, A.F., Axmann, I.M., Heck, A.J.R., 2014. Daily Rhythms in the Cyanobacterium *Synechococcus elongatus* Probed by High-resolution Mass Spectrometry-based Proteomics Reveals a Small Defined Set of Cyclic Proteins. *Mol. Cell. Proteomics* 13, 2042–2055. doi:10.1074/mcp.M113.035840



- Guo, R., Shen, W., Qian, H., Zhang, M., Liu, L., Wang, Q., 2013. Jasmonic acid and glucose synergistically modulate the accumulation of glucosinolates in *Arabidopsis thaliana*. *J. Exp. Bot.* 64, 5707–5719. doi:10.1093/jxb/ert348
- Harmer, S.L., Hogenesch, J.B., Straume, M., Chang, H.-S., Han, B., Zhu, T., Wang, X., Kreps, J.A., Kay, S.A., 2000. Orchestrated Transcription of Key Pathways in *Arabidopsis* by the Circadian Clock. *Science* 290, 2110–2113. doi:10.1126/science.290.5499.2110
- Heide, O.M., King, R.W., Evans, L.T., 1988. The semidiurnal rhythm in flowering response of *Pharbitis nil* in relation to dark period time measurement and to a circadian rhythm. *Physiol. Plant.* 73, 286–294. doi:10.1111/j.1399-3054.1988.tb00599.x
- Ishihara, H., Obata, T., Sulpice, R., Fernie, A.R., Stitt, M., 2015. Quantifying Protein Synthesis and Degradation in *Arabidopsis* by Dynamic <sup>13</sup>CO<sub>2</sub> Labeling and Analysis of Enrichment in Individual Amino Acids in Their Free Pools and in Protein. *Plant Physiol.* 168, 74–93. doi:10.1104/pp.15.00209
- Ito, H., Mutsuda, M., Murayama, Y., Tomita, J., Hosokawa, N., Terauchi, K., Sugita, C., Sugita, M., Kondo, T., Iwasaki, H., 2009. Cyanobacterial daily life with Kai-based circadian and diurnal genome-wide transcriptional control in *Synechococcus elongatus*. *Proc. Natl. Acad. Sci.* 106, 14168–14173. doi:10.1073/pnas.0902587106
- Juntawong, P., Bailey-Serres, J., 2012. Dynamic Light Regulation of Translation Status in *Arabidopsis thaliana*. *Front. Plant Sci.* 3. doi:10.3389/fpls.2012.00066
- Kanehisa, M., Sato, Y., Kawashima, M., Furumichi, M., Tanabe, M., 2016. KEGG as a reference resource for gene and protein annotation. *Nucleic Acids Res.* 44, D457–462. doi:10.1093/nar/gkv1070
- Keily, J., MacGregor, D.R., Smith, R.W., Millar, A.J., Halliday, K.J., Penfield, S., 2013. Model selection reveals control of cold signalling by evening-phased components of the plant circadian clock. *Plant J. n/a-n/a*. doi:10.1111/tbj.12303
- Kinoshita, T., Ono, N., Hayashi, Y., Morimoto, S., Nakamura, S., Soda, M., Kato, Y., Ohnishi, M., Nakano, T., Inoue, S., Shimazaki, K., 2011. FLOWERING LOCUS T Regulates Stomatal Opening. *Curr. Biol.* 21, 1232–1238. doi:10.1016/j.cub.2011.06.025
- Koornneef, M., Alonso-Blanco, C., Vreugdenhil, D., 2004. Naturally occurring genetic variation in *Arabidopsis thaliana*. *Annu. Rev. Plant Biol.* 55, 141–172. doi:10.1146/annurev.arplant.55.031903.141605
- Lee, C.-M., Thomashow, M.F., 2012. Photoperiodic regulation of the C-repeat binding factor (CBF) cold acclimation pathway and freezing tolerance in *Arabidopsis thaliana*. *Proc. Natl. Acad. Sci.* 109, 15054–15059. doi:10.1073/pnas.1211295109
- Li, L., Nelson, C.J., Trösch, J., Castleden, I., Huang, S., Millar, A.H., 2017. Protein Degradation Rate in *Arabidopsis thaliana* Leaf Growth and Development. *Plant Cell* 29, 207–228. doi:10.1105/tpc.16.00768
- Liu, M.-J., Wu, S.-H., Chen, H.-M., Wu, S.-H., 2012. Widespread translational control contributes to the regulation of *Arabidopsis* photomorphogenesis. *Mol. Syst. Biol.* 8. doi:10.1038/msb.2011.97
- Liu, Y., Beyer, A., Aebersold, R., 2016. On the Dependency of Cellular Protein Levels on mRNA Abundance. *Cell* 165, 535–550. doi:10.1016/j.cell.2016.03.014
- Lu, Y., 2005. Daylength and Circadian Effects on Starch Degradation and Maltose Metabolism. *PLANT Physiol.* 138, 2280–2291. doi:10.1104/pp.105.061903
- Marín-Navarro, J., Manuell, A.L., Wu, J., P Mayfield, S., 2007. Chloroplast translation regulation. *Photosynth. Res.* 94, 359–374. doi:10.1007/s11120-007-9183-z
- Martin, S.F., Munagapati, V.S., Salvo-Chirnside, E., Kerr, L.E., Le Bihan, T., 2012. Proteome Turnover in the Green Alga *Ostreococcus tauri* by Time Course <sup>15</sup>N Metabolic Labeling Mass Spectrometry. *J. Proteome Res.* 11, 476–486. doi:10.1021/pr2009302
- Matallana-Surget, S., Derock, J., Leroy, B., Badri, H., Deschoenmaeker, F., Wattiez, R., 2014. Proteome-Wide Analysis and Diel Proteomic Profiling of the Cyanobacterium *Arthrospira platensis* PCC 8005. *PLoS ONE* 9, e99076. doi:10.1371/journal.pone.0099076

- Mauvoisin, D., Wang, J., Jouffe, C., Martin, E., Atger, F., Waridel, P., Quadroni, M., Gachon, F., Naef, F., 2014. Circadian clock-dependent and -independent rhythmic proteomes implement distinct diurnal functions in mouse liver. *Proc. Natl. Acad. Sci.* 111, 167–172. doi:10.1073/pnas.1314066111
- Mengin, V., Pyl, E. T., Moraes, T. A., Sulpice, R., Krohn, N., Encke, B., Stitt, M., 2017. Photosynthate partitioning to starch in *Arabidopsis thaliana* is insensitive to light intensity but sensitive to photoperiod due to a restriction on growth in the light in short photoperiods. *Plant, Cell & Environment*. doi: 10.1111/pce.13000
- Miao, H., Wei, J., Zhao, Y., Yan, H., Sun, B., Huang, J., Wang, Q., 2013. Glucose signalling positively regulates aliphatic glucosinolate biosynthesis. *J. Exp. Bot.* 64, 1097–1109. doi:10.1093/jxb/ers399
- Michael, T.P., Breton, G., Hazen, S.P., Priest, H., Mockler, T.C., Kay, S.A., Chory, J., 2008a. A morning-specific phytohormone gene expression program underlying rhythmic plant growth. *PLoS Biol.* 6, e225. doi:10.1371/journal.pbio.0060225
- Michael, T.P., Mockler, T.C., Breton, G., McEntee, C., Byer, A., Trout, J.D., Hazen, S.P., Shen, R., Priest, H.D., Sullivan, C.M., Givan, S.A., Yanovsky, M., Hong, F., Kay, S.A., Chory, J., 2008b. Network Discovery Pipeline Elucidates Conserved Time-of-Day-Specific cis-Regulatory Modules. *PLoS Genet.* 4, e14. doi:10.1371/journal.pgen.0040014
- Millar, A.J., 2016. The Intracellular Dynamics of Circadian Clocks Reach for the Light of Ecology and Evolution. *Annu. Rev. Plant Biol.* 67, 595–618. doi:10.1146/annurev-arplant-043014-115619
- Missra, A., Ernest, B., Lohoff, T., Jia, Q., Satterlee, J., Ke, K., von Arnim, A.G., 2015. The Circadian Clock Modulates Global Daily Cycles of mRNA Ribosome Loading. *Plant Cell* 27, 2582–2599. doi:10.1105/tpc.15.00546
- Miyagishima, S., Fujiwara, T., Sumiya, N., Hirooka, S., Nakano, A., Kabeya, Y., Nakamura, M., 2014. Translation-independent circadian control of the cell cycle in a unicellular photosynthetic eukaryote. *Nat. Commun.* 5. doi:10.1038/ncomms4807
- Mockler, T.C., Michael, T.P., Priest, H.D., Shen, R., Sullivan, C.M., Givan, S.A., McEntee, C., Kay, S.A., Chory, J., 2007. The Diurnal Project: Diurnal and Circadian Expression Profiling, Model-based Pattern Matching, and Promoter Analysis. *Cold Spring Harb. Symp. Quant. Biol.* 72, 353–363. doi:10.1101/sqb.2007.72.006
- MongéLard, G., Seemann, M., Boisson, A.-M., Rohmer, M., Bigny, R., Rivasseau, C., 2011. Measurement of carbon flux through the MEP pathway for isoprenoid synthesis by <sup>31</sup>P-NMR spectroscopy after specific inhibition of 2-C-methyl-d-erythritol 2,4-cyclodiphosphate reductase. Effect of light and temperature: Carbon flux through the MEP pathway. *Plant Cell Environ.* 34, 1241–1247. doi:10.1111/j.1365-3040.2011.02322.x
- Monnier, A., Liverani, S., Bouvet, R., Jesson, B., Smith, J.Q., Mosser, J., Corellou, F., Bouget, F.-Y., 2010. Orchestrated transcription of biological processes in the marine picoeukaryote *Ostreococcus* exposed to light/dark cycles. *BMC Genomics* 11, 192. doi:10.1186/1471-2164-11-192
- Nozue, K., Covington, M.F., Duek, P.D., Lorrain, S., Fankhauser, C., Harmer, S.L., Maloof, J.N., 2007. Rhythmic growth explained by coincidence between internal and external cues. *Nature* 448, 358–361. doi:10.1038/nature05946
- Orzechowski, S., 2008. Starch metabolism in leaves. *Acta Biochim. Pol.* 55, 435–445.
- Pal, S.K., Liput, M., Piques, M., Ishihara, H., Obata, T., Martins, M.C.M., Sulpice, R., van Dongen, J.T., Fernie, A.R., Yadav, U.P., Lunn, J.E., Usadel, B., Stitt, M., 2013. Diurnal Changes of Polysome Loading Track Sucrose Content in the Rosette of Wild-Type *Arabidopsis* and the Starchless *pgm* Mutant. *PLANT Physiol.* 162, 1246–1265. doi:10.1104/pp.112.212258
- Pilkington, S.M., Encke, B., Krohn, N., Höhne, M., Stitt, M., Pyl, E.-T., 2015. Relationship between starch degradation and carbon demand for maintenance and growth in *Arabidopsis thaliana* in different irradiance and temperature regimes. *Plant Cell Environ.* 38, 157–171. doi:10.1111/pce.12381
- Piques, M., Schulze, W.X., Höhne, M., Usadel, B., Gibon, Y., Rohwer, J., Stitt, M., 2009. Ribosome and transcript copy numbers, polysome occupancy and enzyme dynamics in *Arabidopsis*. *Mol. Syst. Biol.* 5. doi:10.1038/msb.2009.68

- Ren, M., Venglat, P., Qiu, S., Feng, L., Cao, Y., Wang, E., Xiang, D., Wang, J., Alexander, D., Chalivendra, S., Logan, D., Mattoo, A., Selvaraj, G., Datla, R., 2012. Target of rapamycin signaling regulates metabolism, growth, and life span in Arabidopsis. *Plant Cell* 24, 4850–4874. doi:10.1105/tpc.112.107144
- Salazar, J.D., Saithong, T., Brown, P.E., Foreman, J., Locke, J.C.W., Halliday, K.J., Carré, I.A., Rand, D.A., Millar, A.J., 2009. Prediction of Photoperiodic Regulators from Quantitative Gene Circuit Models. *Cell* 139, 1170–1179. doi:10.1016/j.cell.2009.11.029
- Saunders, D.S., 2013. Insect photoperiodism: Measuring the night. *J. Insect Physiol.* 59, 1–10. doi:10.1016/j.jinsphys.2012.11.003
- Seaton, D.D., Smith, R.W., Song, Y.H., MacGregor, D.R., Stewart, K., Steel, G., Foreman, J., Penfield, S., Imaizumi, T., Millar, A.J., Halliday, K.J., 2015. Linked circadian outputs control elongation growth and flowering in response to photoperiod and temperature. *Mol. Syst. Biol.* 11. doi:10.15252/msb.20145766
- Smith, A.M., Stitt, M., 2007. Coordination of carbon supply and plant growth. *Plant Cell Environ.* 30, 1126–1149. doi:10.1111/j.1365-3040.2007.01708.x
- Song, Y.H., Shim, J.S., Kinmonth-Schultz, H.A., Imaizumi, T., 2015. Photoperiodic Flowering: Time Measurement Mechanisms in Leaves. *Annu. Rev. Plant Biol.* 66, 441–464. doi:10.1146/annurev-arplant-043014-115555
- Stitt, M., Lilley, R.M., Heldt, H.W., 1982. Adenine nucleotide levels in the cytosol, chloroplasts, and mitochondria of wheat leaf protoplasts. *Plant Physiol.* 70, 971–977.
- Stitt, M., Lunn, J., Usadel, B., 2010. Arabidopsis and primary photosynthetic metabolism - more than the icing on the cake. *Plant J. Cell Mol. Biol.* 61, 1067–1091. doi:10.1111/j.1365-313X.2010.04142.x
- Stitt, M., Zeeman, S.C., 2012. Starch turnover: pathways, regulation and role in growth. *Curr. Opin. Plant Biol.* 15, 282–292. doi:10.1016/j.pbi.2012.03.016
- Sulpice, R., Flis, A., Ivakov, A.A., Apelt, F., Krohn, N., Encke, B., Abel, C., Feil, R., Lunn, J.E., Stitt, M., 2014. Arabidopsis Coordinates the Diurnal Regulation of Carbon Allocation and Growth across a Wide Range of Photoperiods. *Mol. Plant* 7, 137–155. doi:10.1093/mp/sst127
- Tan, Y., Dragovic, Z., Roenneberg, T., Mellow, M., 2004. Entrainment Dissociates Transcription and Translation of a Circadian Clock Gene in *Neurospora*. *Curr. Biol.* 14, 433–438. doi:10.1016/j.cub.2004.02.035
- Textor, S., Gershenzon, J., 2009. Herbivore induction of the glucosinolate–myrosinase defense system: major trends, biochemical bases and ecological significance. *Phytochem. Rev.* 8, 149–170. doi:10.1007/s11101-008-9117-1
- Vogel, C., Marcotte, E.M., 2012. Insights into the regulation of protein abundance from proteomic and transcriptomic analyses. *Nat. Rev. Genet.* 13, 227–232. doi:10.1038/nrg3185
- Vranová, E., Coman, D., Grisse, W., 2013. Network Analysis of the MVA and MEP Pathways for Isoprenoid Synthesis. *Annu. Rev. Plant Biol.* 64, 665–700. doi:10.1146/annurev-arplant-050312-120116
- Wang, S.-M., Chu, B., Lue, W.-L., Yu, T.-S., Eimert, K., Chen, J., 1997. *adg2-1* represents a missense mutation in the ADPG pyrophosphorylase large subunit gene of Arabidopsis thaliana. *Plant J.* 11, 1121–1126. doi:10.1046/j.1365-313X.1997.11051121.x
- Wientjes, E., van Amerongen, H., Croce, R., 2013. Quantum Yield of Charge Separation in Photosystem II: Functional Effect of Changes in the Antenna Size upon Light Acclimation. *J. Phys. Chem. B* 117, 11200–11208. doi:10.1021/jp401663w
- Wingler, A., Fritzius, T., Wiemken, A., Boller, T., Aeschbacher, R.A., 2000. Trehalose induces the ADP-glucose pyrophosphorylase gene, *ApL3*, and starch synthesis in Arabidopsis. *Plant Physiol.* 124, 105–114.
- Yanovsky, M.J., Kay, S.A., 2002. Molecular basis of seasonal time measurement in Arabidopsis. *Nature* 419, 308–312. doi:10.1038/nature00996

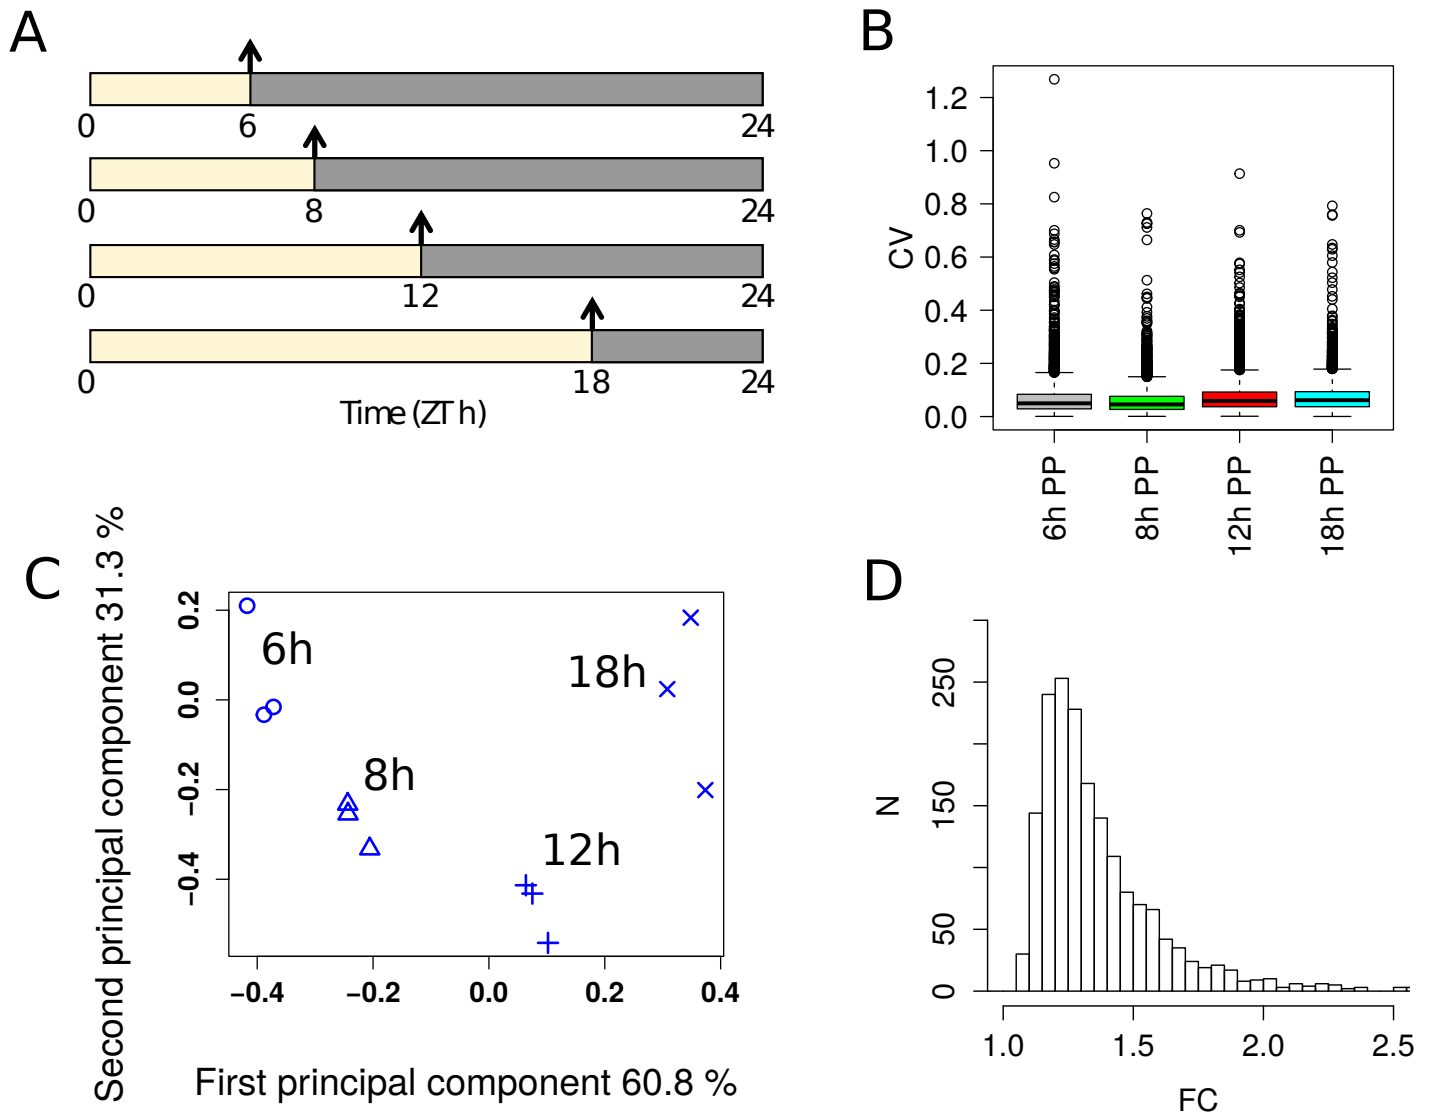

**Figure 1. Overview of photoperiod proteome dataset.**

**A** Summary of sampling protocol. Samples were taken at the end of the day (arrows) from 30-day old plants grown for 9 days in photoperiods of 6, 8, 12, and 18h duration.

**B** Boxplot of coefficient of variation (CV) across three biological replicates for each photoperiod.

**C** Principal component analysis of proteomics dataset, showing % variance explained by each component. The three biological replicates from each photoperiod cluster together.

**D** Histogram of maximal fold changes (FC) across proteins identified as significantly changing with photoperiod (P-value < 0.05).

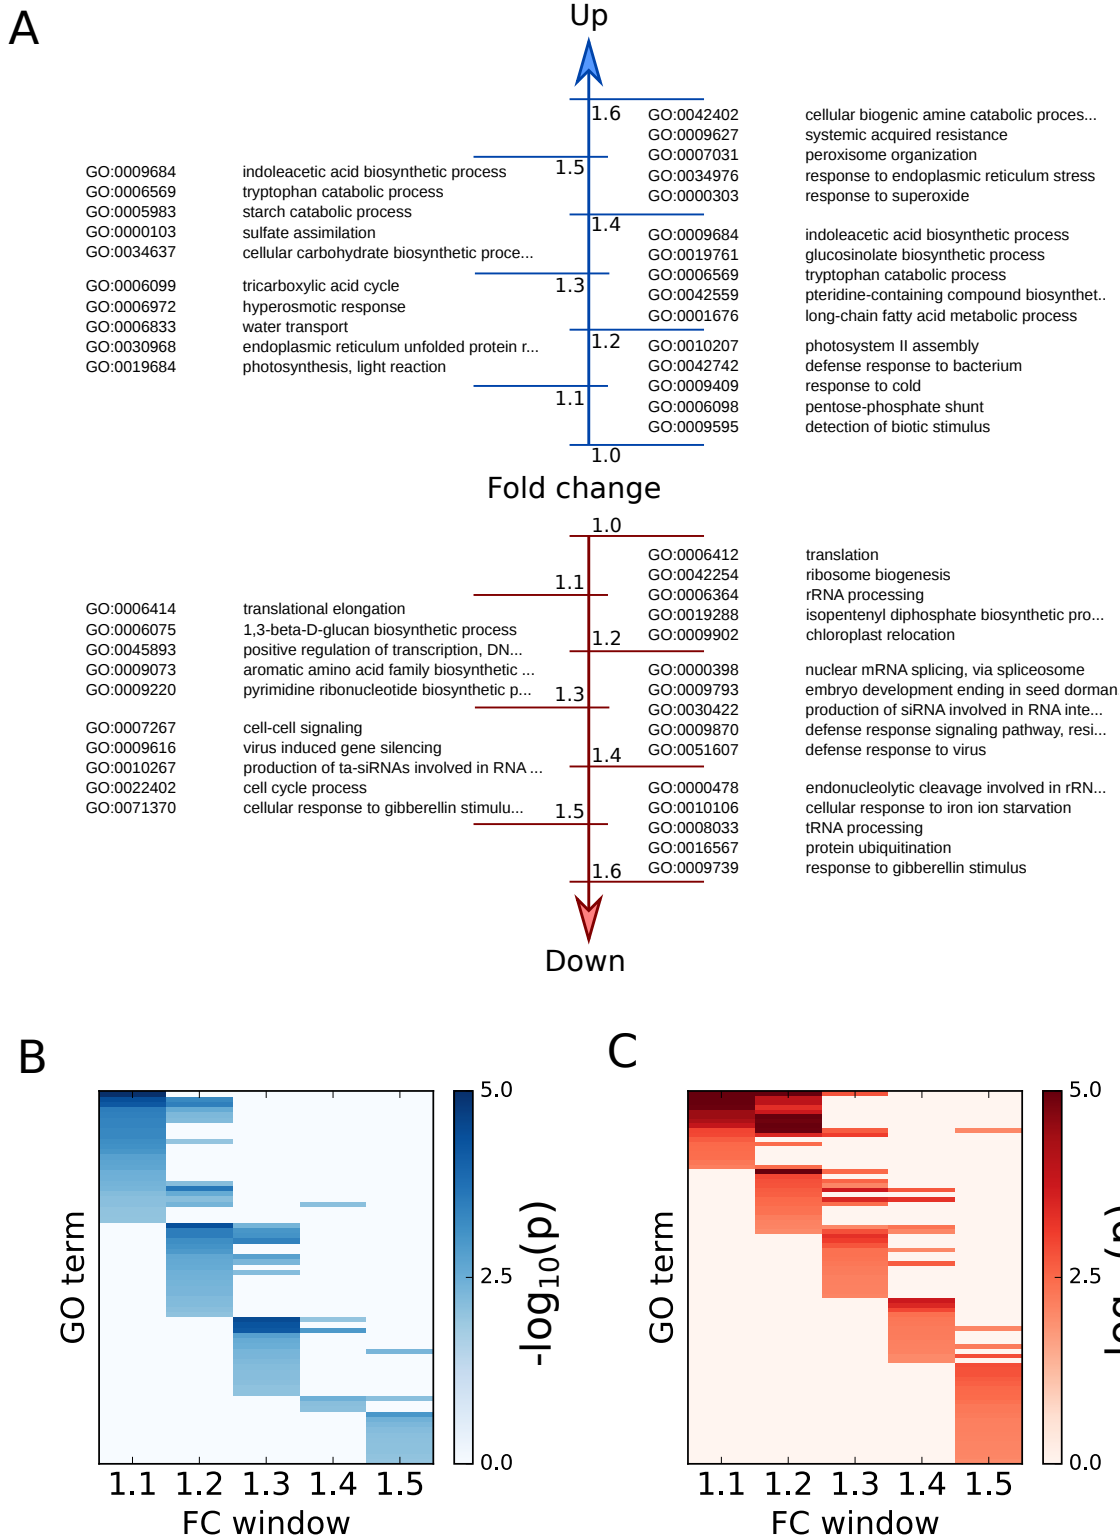

**Figure 2. Enrichment of GO terms in fold change (FC) windows for proteins up- and down-regulated with increasing photoperiod.**

**A** Five high-scoring GO enrichments of proteins are listed for each FC window.

**B** Heatmap of GO enrichments for each FC window for significantly upregulated proteins (enrichment scored by  $-\log_{10}(p)$ -value) of Fisher's exact test).

**C** As in **B**, for significantly downregulated proteins.

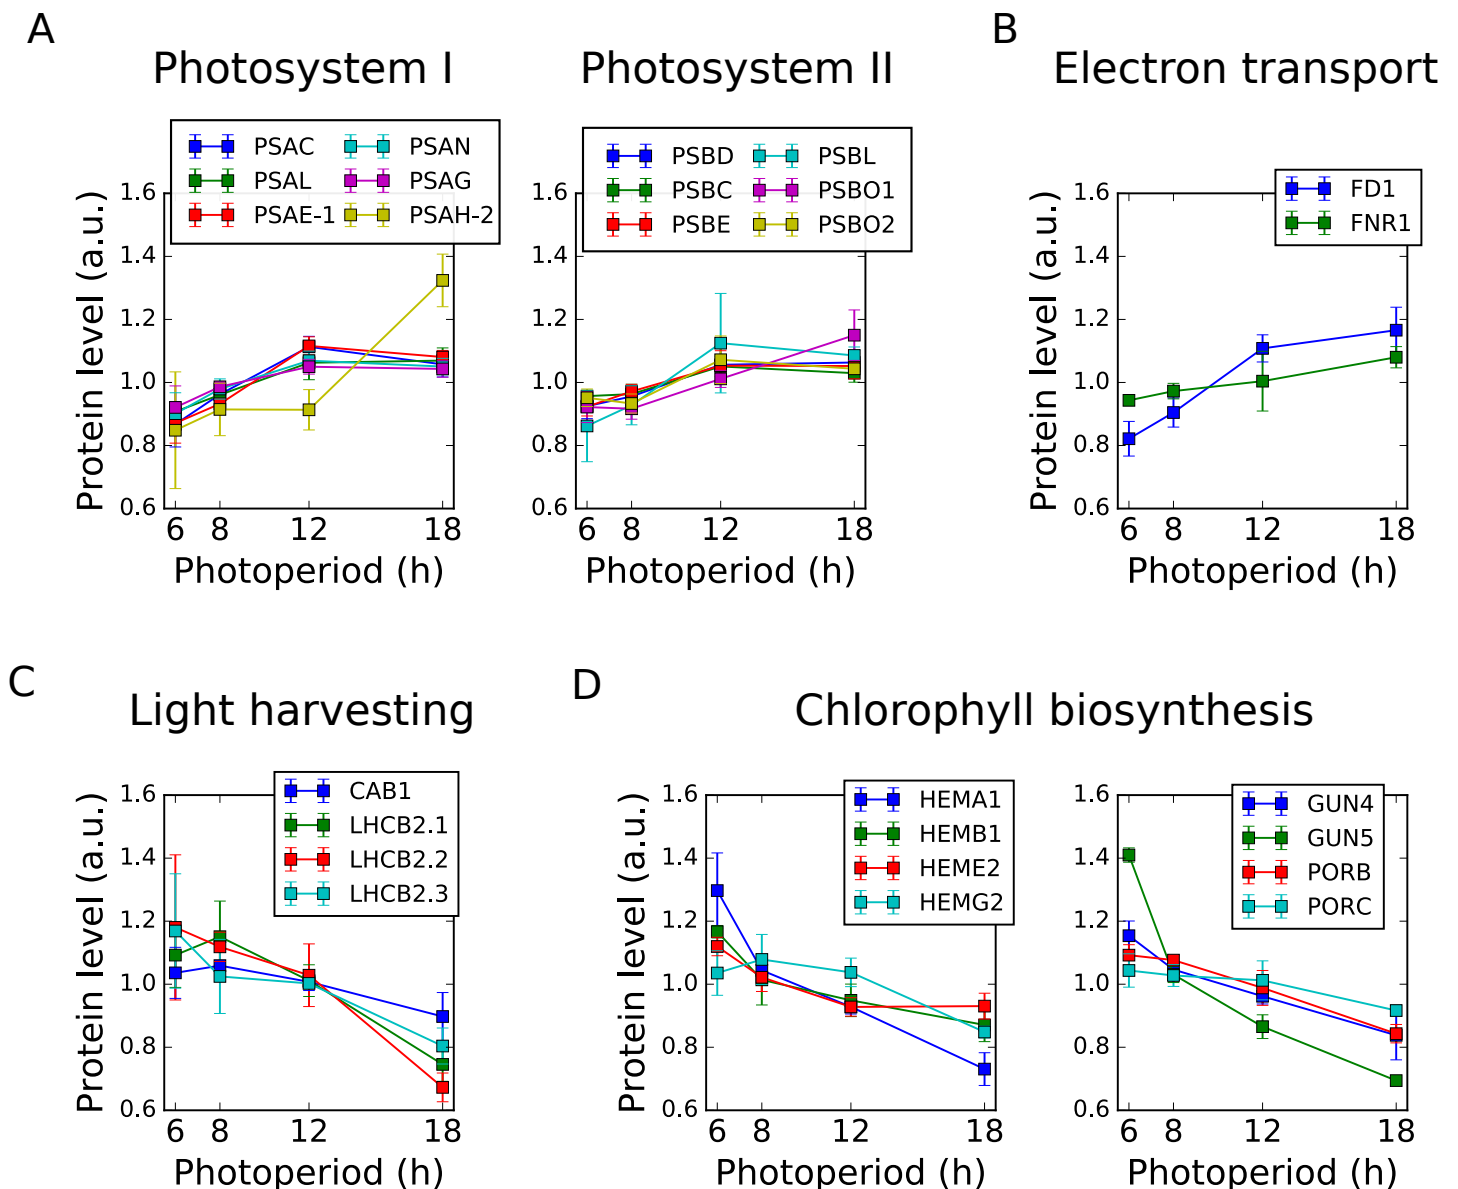

**Figure 3. Photoperiod modulates protein levels in processes and complexes involved in photosynthesis.**

**A** Significantly up-regulated proteins in photosystem I and II: photosystem I subunits C, L, E, N, G, H (PSAC, PSAL, PSAE-1, PSAN, PSAG, PSAH-2), photosystem II subunits D, C, E, L, O1, O2 (PSBD, PSBC, PSBE, PSBL, PSBO1, PSBO2).

**B** Significantly up-regulated proteins in the electron transport chain: ferredoxin 1 (FD1) and ferredoxin-NADP-oxidoreductase 1 (FNR1).

**C** Significantly down-regulated proteins in the light harvesting complex: Chlorophyll a-b binding proteins 1, 2.1, 2.2, and 2.3 (CAB1, LHCB2.1, LHCB2.2, LHCB2.30).

**D** Significantly down-regulated proteins in chlorophyll biosynthesis, including enzymes involved in heme biosynthesis (glutamyl-tRNA reductase 1 (HEMA1); delta-aminolevulinic acid dehydratase 1 (HEMB1); uroporphyrinogen decarboxylase 2 (HEME2)), as well as tetrapyrrole-binding protein (GUN4), magnesium-chelatase (GUN5), and NADPH:protochlorophyllide oxidoreductases (PORB, PORC).

## A Sucrose metabolism ADP-Glc synthesis Starch synthesis

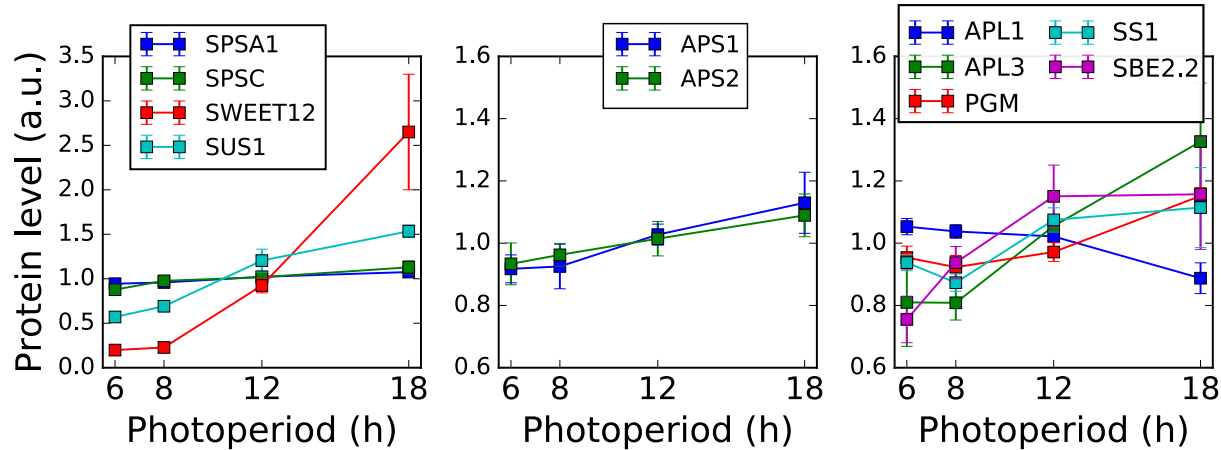

## B Starch degradation Maltose metabolism

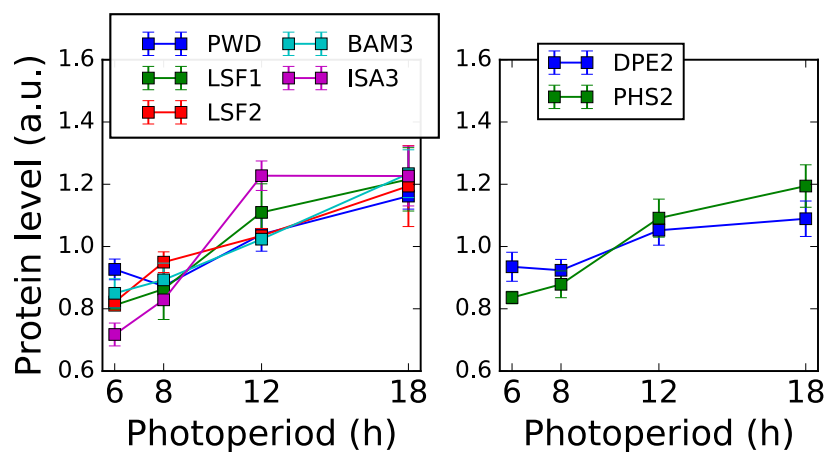

## C Sulfate metabolism

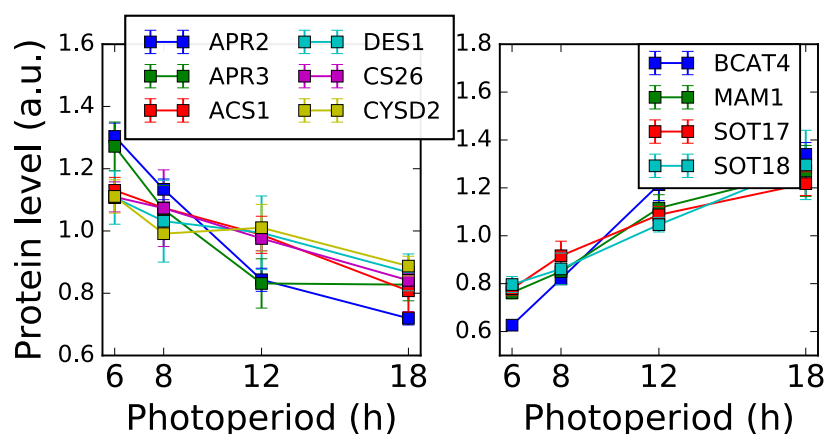

**Figure 4. Photoperiod modulates protein levels of enzymes involved in primary and secondary metabolism.**

**A** Significantly changing proteins involved in the partitioning of sugars to sucrose and starch during the day. Includes sucrose metabolism (sucrose-phosphate synthase, SPSA1, SPSC; bidirectional sugar transporter, SWEET12; sucrose synthase, SUS1), ADP-Glc synthesis (glucose-1-phosphate adenylyltransferase small subunits, APS1, APS2), and starch synthesis (glucose-1-phosphate adenylyltransferase large subunits, APL1, APL3; phosphoglucomutase, PGM; starch synthase, SS1; 1,4-alpha-glucan-branching enzyme, SBE2.2).

**B** Significantly up-regulated proteins involved in metabolism of starch during the night. Includes starch degradation (phosphoglucan, water dikinase, PWD; phosphoglucan phosphatase, LSF1, LSF2; beta-amylase, BAM3; isoamylase, ISA3), and maltose metabolism (4-alpha-glucanotransferase, DPE2; alpha-glucan phosphorylase, PHS2).

**C** Significantly down-regulated proteins in sulfate metabolism. Includes 5'-adenylylsulfate reductases (APR2, APR3), cysteine synthases (ACS1, DES1, CS26, CYSD2), methionine aminotransferase (BCAT4), methylthioalkylmalate synthase (MAM1), and cytosolic sulfotransferases (SOT17, SOT18).

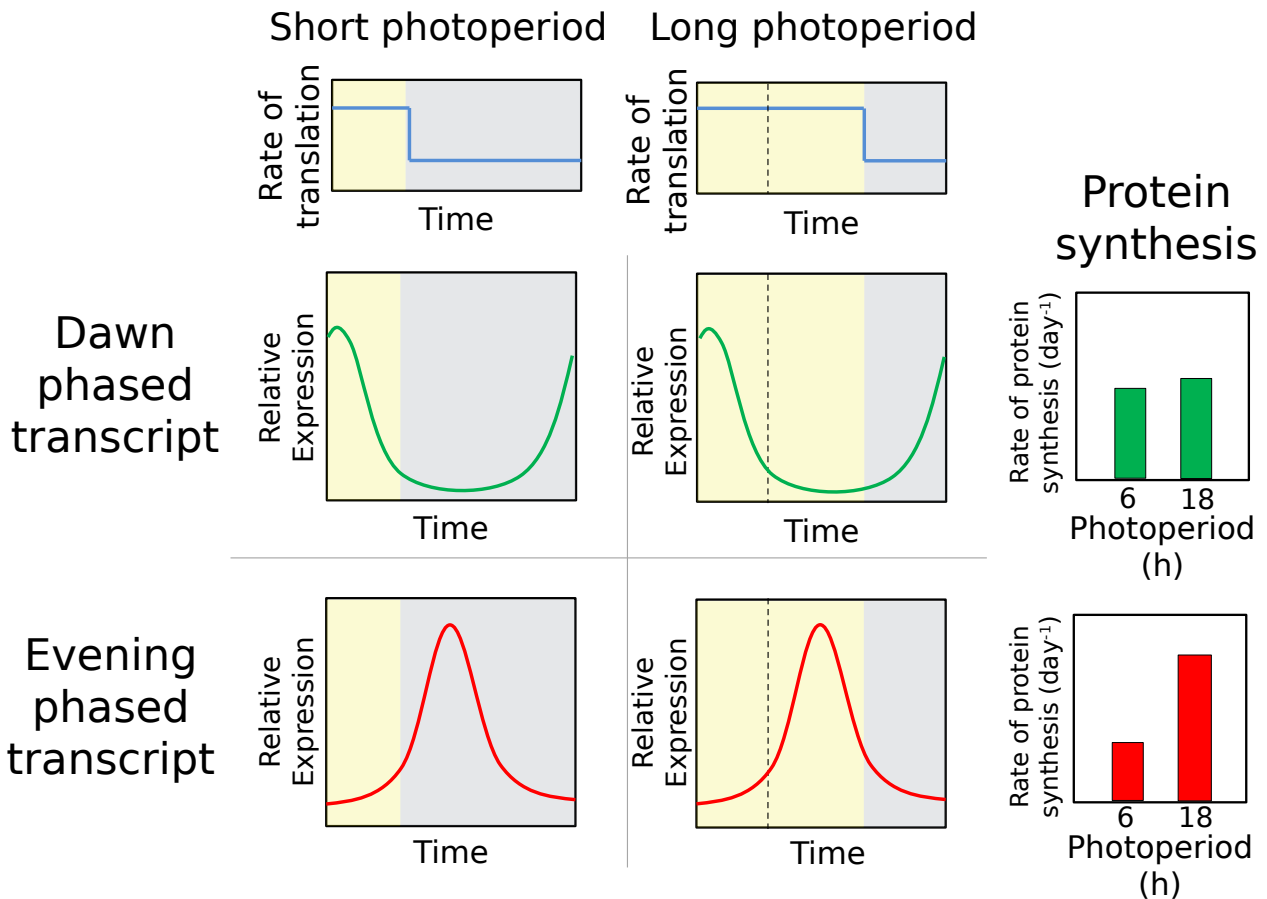

**Figure 5. Expected effects of the changing coincidence of protein synthesis with transcript.**

Light maintains high rates of protein synthesis for longer in longer photoperiods (top panels), which is expected to be without consequence for protein synthesis from dawn-phased transcripts (center panels), but results in a boost of protein synthesis from transcripts expressed late in the day (bottom panels).



A

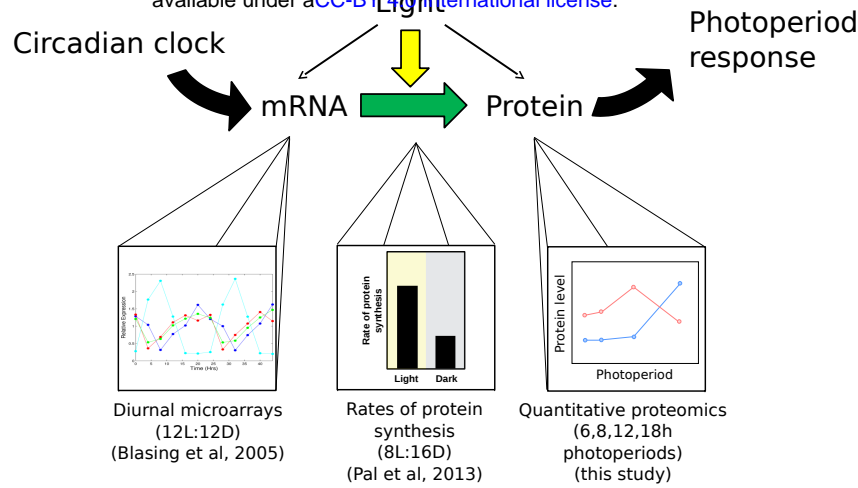

B

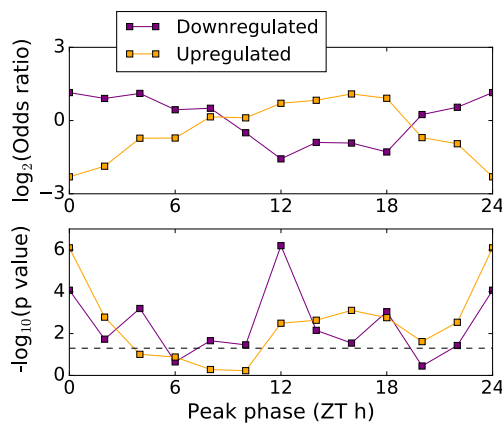

C

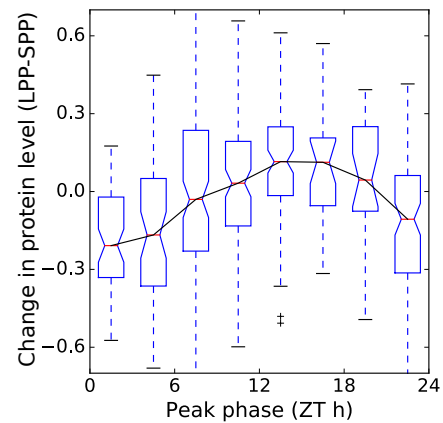

D

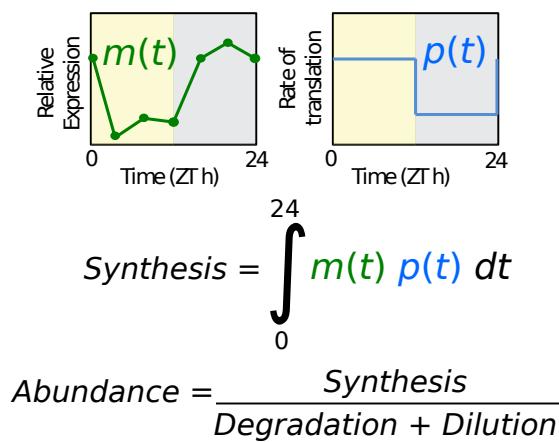

E

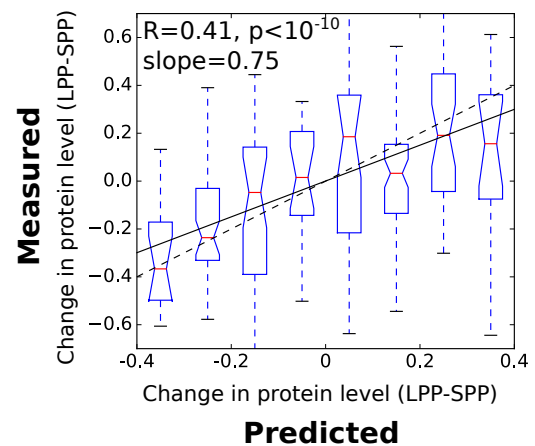

**Figure 6. Evaluating circadian control of protein changes with photoperiod.**

**A** Schematic of the data integration, relating quantitative transcript and protein synthesis measurements to quantitative proteomics measurements.

**B** Phase enrichment of proteins identified as significantly up- and downregulated in long photoperiods, evaluated by Fisher's Exact Test, with transcripts grouped by phase in two-hour intervals.

**C** Change in protein level between short (6h) and long (18h) photoperiods (LPP-SPP), grouped according to the peak phase of transcript expression.

**D** Schematic of a simple model of protein synthesis, using measured mRNA ( $m$ ) and protein ( $p$ ) input data.

**E** Comparison of model to data, for changes between 6h and 18h photoperiods (LPP-SPP) for the 251 proteins with rhythms in RNA abundance with amplitude  $>1.7$ . Changes are plotted as differences between photoperiods, normalised to the mean. The dashed line indicates the case where model predictions match measured values. The solid line indicates the linear fit to the plotted data.

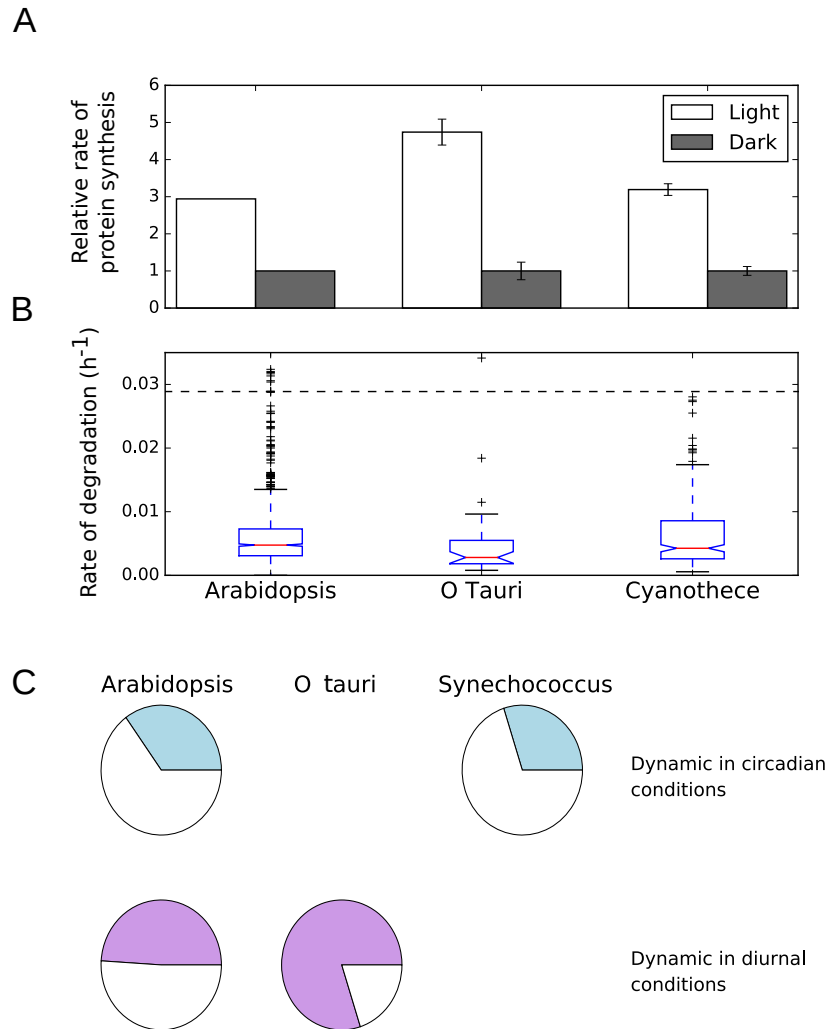

**Figure 7. Ingredients of translational coincidence in diverse photoautotrophic organisms.**

**A** Light-stimulated protein synthesis. Relative rates of protein synthesis in the light compared to the dark have been reported in Arabidopsis (Pal et al., 2013), and were inferred from quantitative proteomics stable isotope labelling datasets for *Ostreococcus* (Martin et al., 2012) and *Cyanothece* (Aryal et al., 2011) (see Materials and Methods for details).

**B** Slow rates of protein turnover. The dashed line represents a half-life of 1 day. Protein degradation rates have been reported for Arabidopsis (Li et al., 2017), and were inferred from quantitative proteomics data for *Ostreococcus* and *Cyanothece*, as in **A** (see Materials and Methods for details).

**C** Diurnal and circadian dynamics in gene expression. Shaded areas represent the fraction of the transcriptome estimated to be dynamic in circadian (top row) and diurnal (bottom row) conditions.

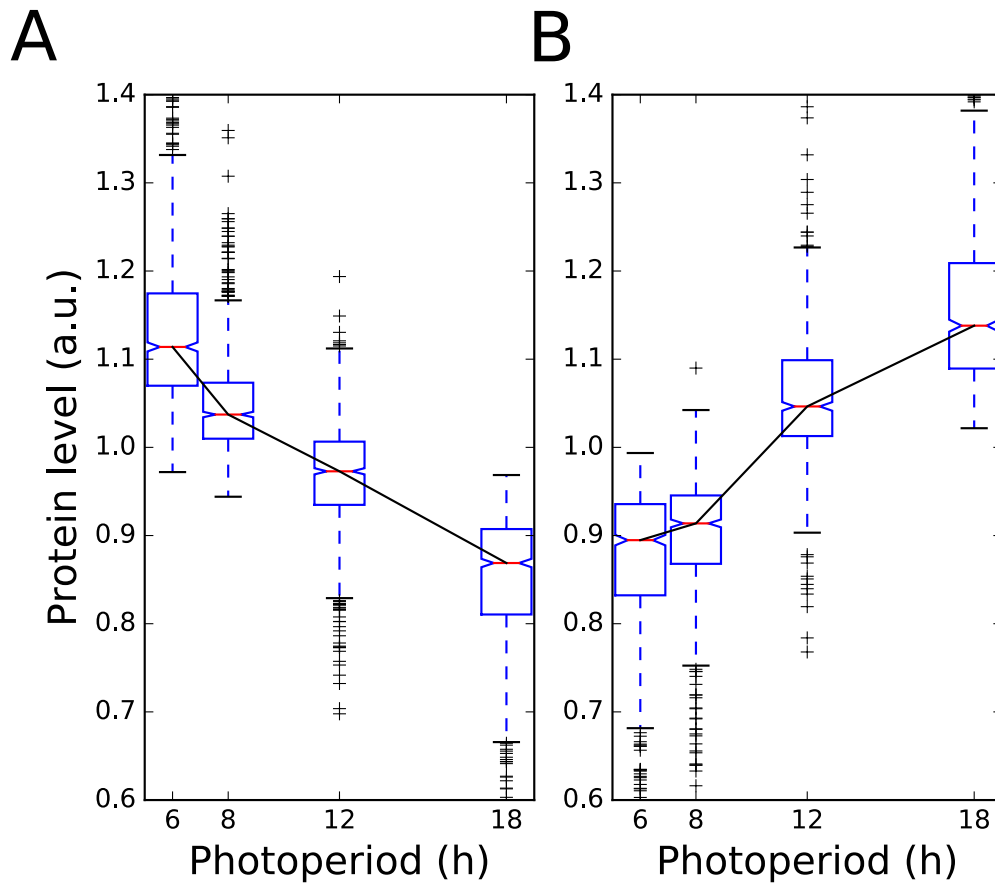

**Figure EV1. Progressive changes in abundance across photoperiods for proteins exhibiting significant changes with photoperiod.**

**A** Protein abundance across photoperiods for proteins which decrease in abundance in longer photoperiods. Protein abundance for each protein was mean-normalised.

**B** As in **A**, for proteins which increase in abundance in longer photoperiods.

**A**

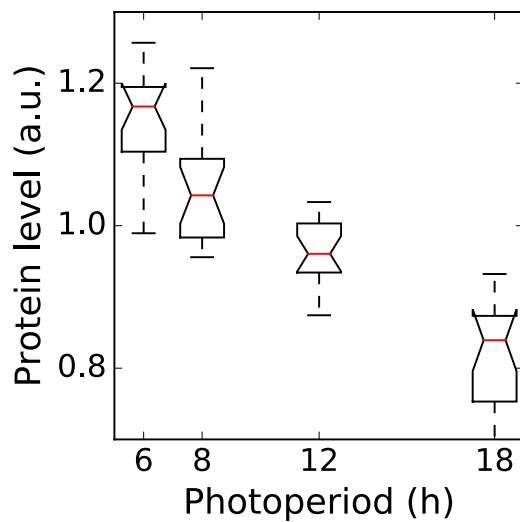

**B**

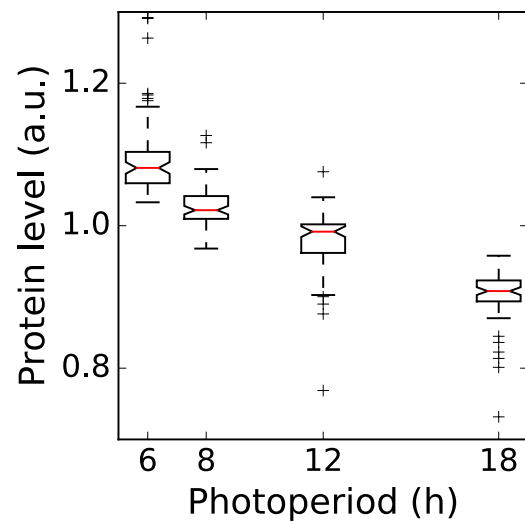

**Figure EV2. Coordinated changes in ribosome biogenesis and ribosomal components.**

**A** Changes in protein levels for 19 proteins in the KEGG pathway for ribosome biogenesis that decrease in abundance with increasing photoperiod length, with each protein normalised to its own mean level across all four photoperiods.

**B** As in **A**, for 85 proteins in the KEGG pathway for ribosomes that decrease in abundance with increasing photoperiod length.

**A**

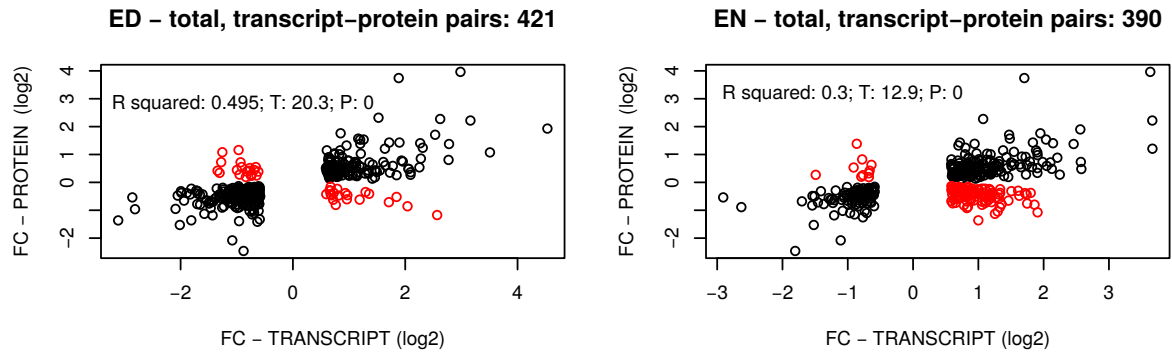

**B**

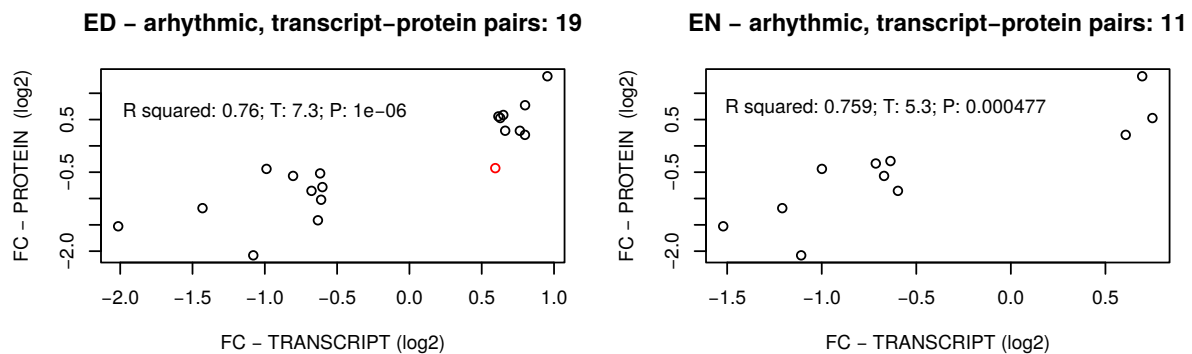

### Figure EV3. Comparison of transcriptome and proteome photoperiod datasets.

**A** Correlations between the photoperiod proteome data and transcripts identified as exhibiting significant changes across photoperiods. Fold changes across photoperiods in transcripts and proteins are compared. Changing transcripts were identified at both ED and EN timepoints (left- and right-hand panels, respectively), as described in Flis et al, 2016. Black dots indicate the direction of change was the same for both transcripts and proteins; red dots indicate the direction of change was different for transcripts and proteins. Transcript data are from samples taken from the same plants as were used for our proteomic analysis, and were described in Flis et al, 2016.

**B** As in **A**, for a subset of reliably arrhythmic transcripts (see Materials and methods for procedure used to identify arrhythmic transcripts).

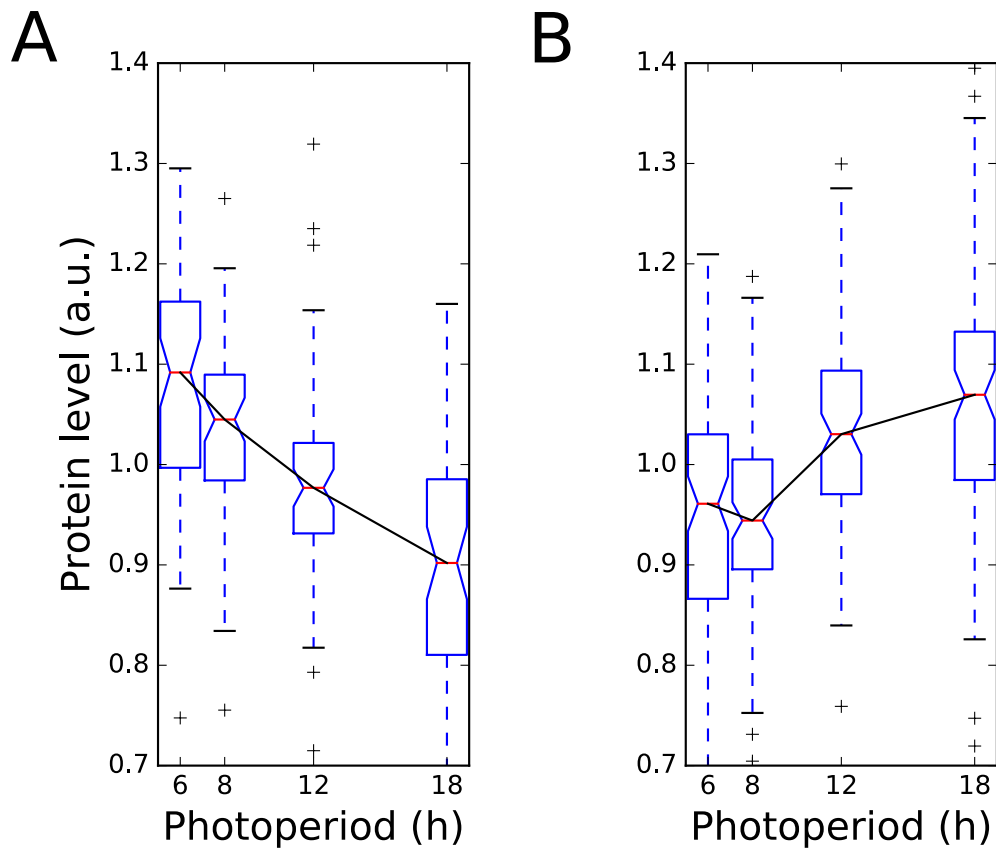

**Figure EV4. Progressive changes in abundance across photoperiods for proteins with dawn- and evening-phased transcripts.**

**A** Protein abundance across photoperiods for proteins whose transcripts peak in expression between ZT0 and ZT2 in the microarray timecourse dataset of Blasing et al. (2005). Protein abundance for each protein was mean-normalised.

**B** As in **A**, for proteins whose transcripts peak between ZT12 and ZT14.

**A**

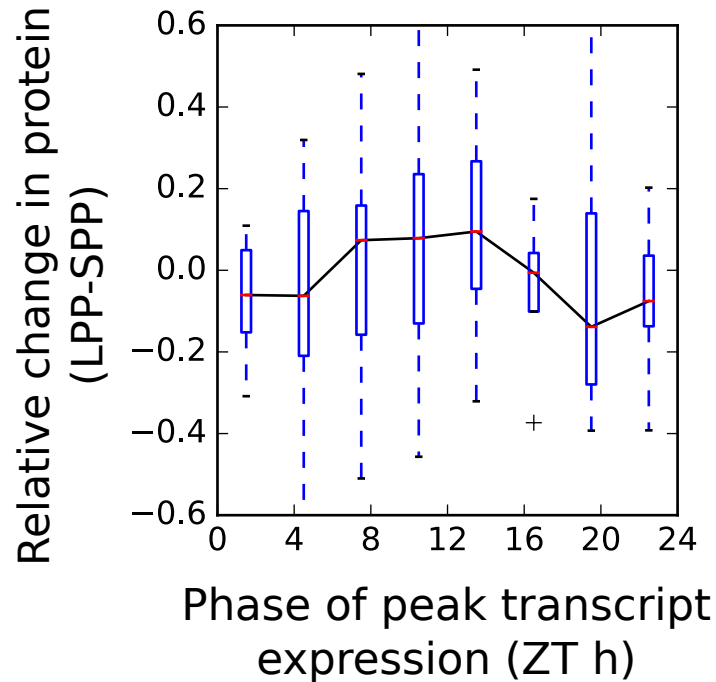

**B**

|    | Leaf stage |       |       |       |
|----|------------|-------|-------|-------|
|    | 1          | 2     | 3     | 4     |
| ED | 0.0007     | 0.033 | 0.024 | 0.026 |
| EN | 0.002      | 0.067 | 0.022 | 0.39  |

**Figure EV5. Protein response to photoperiod in an independent dataset.**

**A** Changes in protein levels between 8h (SPP) and 16h (LPP) photoperiods, as measured in Baerenfaller et al. (2015), grouped according to the phase of peak transcript expression.

**B** p-values of differences in protein levels for proteins across for leaf development stages (Baerenfaller et al., 2015) with evening-phased (ZT10 to ZT14, inclusive) and dawn-phased (ZT22 to ZT2, inclusive) transcripts (Bläsing et al., 2005), as calculated by Mann-Whitney U test (note that in all cases the mean of the change from SPP to LPP was higher for the evening-phased group than the dawn-phased groups, as expected).

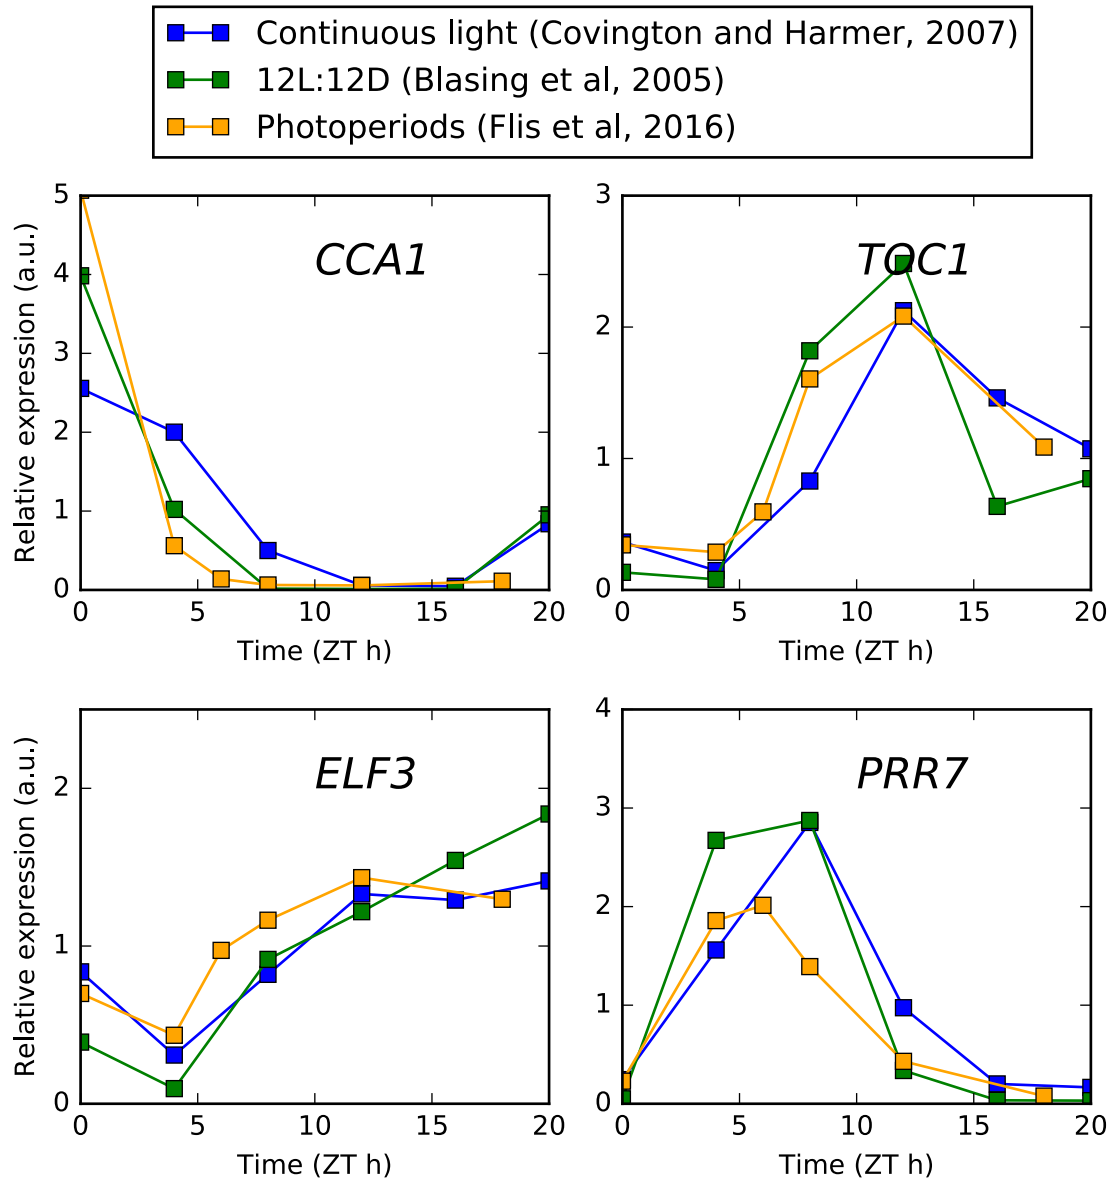

**Figure EV6. Comparison of core clock transcript expression in different conditions.**

Timeseries microarray data are plotted from experiments conducted in continuous light (Covington and Harmer, 2007) and 12L:12D light:dark cycles (Blasing et al, 2005), along with pseudo-timeseries data from combined EN and ED samples across 4, 6, 8, 12, and 18h photoperiods (Flis et al, 2016).



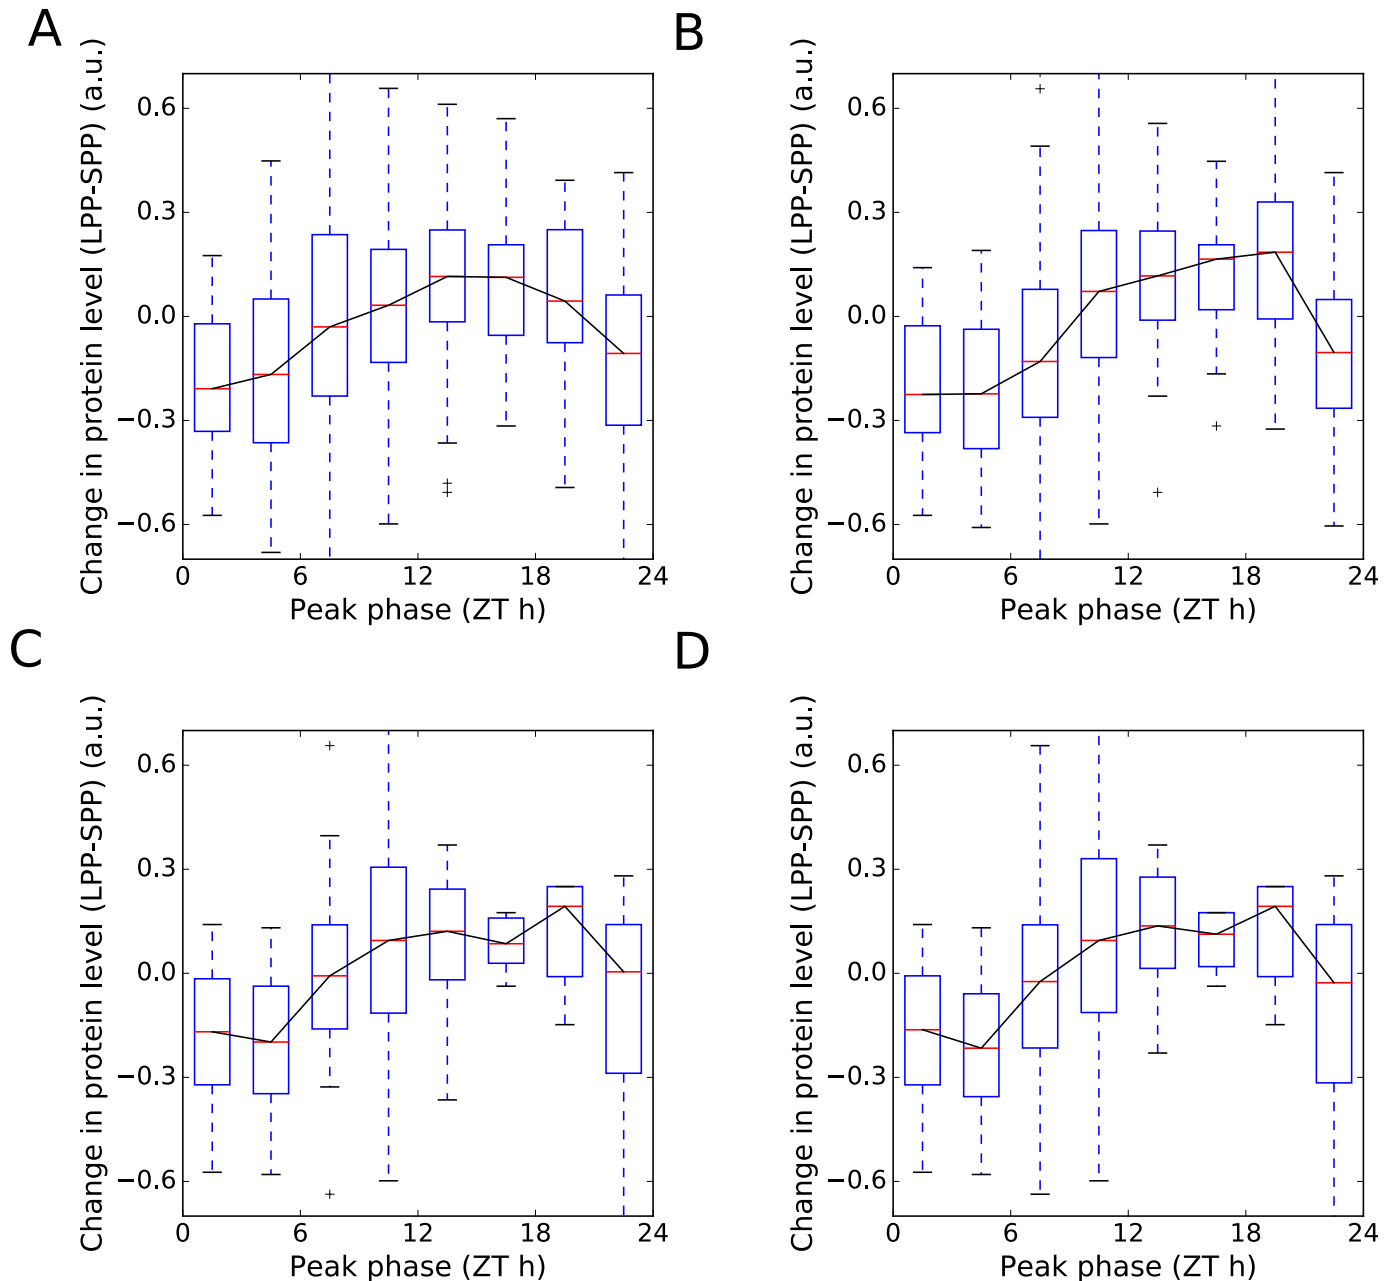

**Figure EV7. Protein regulation with photoperiod after filtering for transcriptional regulation.**

**A** Protein changes between 6h (SPP) and 18h (LPP) photoperiods, grouped by phase of peak expression, are shown for all 547 proteins with rhythmic transcripts.

**B** As in **A**, for the subset of 341 transcripts without changing levels across photoperiods, as judged by a comparison with the photoperiod microarray dataset of Flis et al, (2016) (see text for details).

**C** As in **A**, for the subset of 142 transcripts predominantly controlled by the circadian clock, as judged by a comparison with the circadian microarray dataset of Covington and Harmer (2007) (see text for details).

**D** As in **A**, for the 125 transcripts in the intersection of the subsets shown in **B** and **C**.

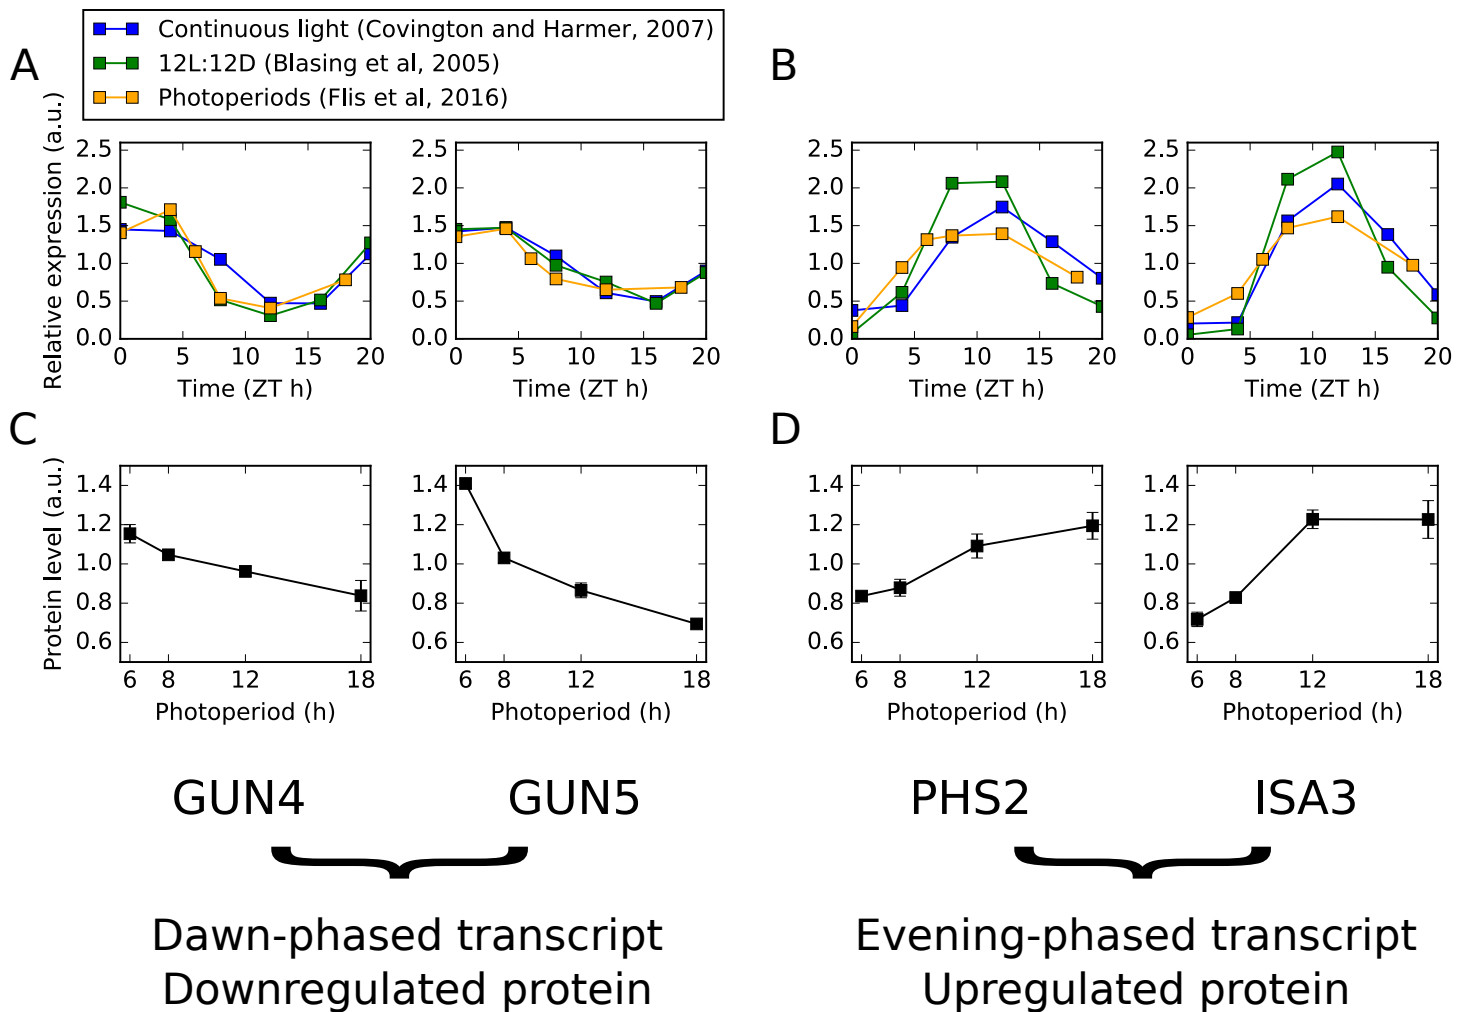

**Figure EV8. Illustrative examples of photoperiod responses by translational coincidence.**

**A, B** Gene expression for dawn-phased genes (*GUN4*, *GUN5*) are shown in **A** and evening-phased genes (*PHS2*, *ISA3*) are shown in **B** in multiple conditions, as measured by microarray. Time series data from experiments conducted in continuous light (Covington and Harmer, 2007) and 12L:12D light:dark cycles (Blasing et al, 2005), along with pseudo-timeseries data from combined EN and ED samples across 4, 6, 8, 12, and 18h photoperiods (Flis et al, 2016). Data was mean-normalised.

**C, D** Protein abundance across photoperiods for transcripts quantified in **A** and **B**, as quantified by mass spectrometry (this study). Error bars denote standard error of the mean.

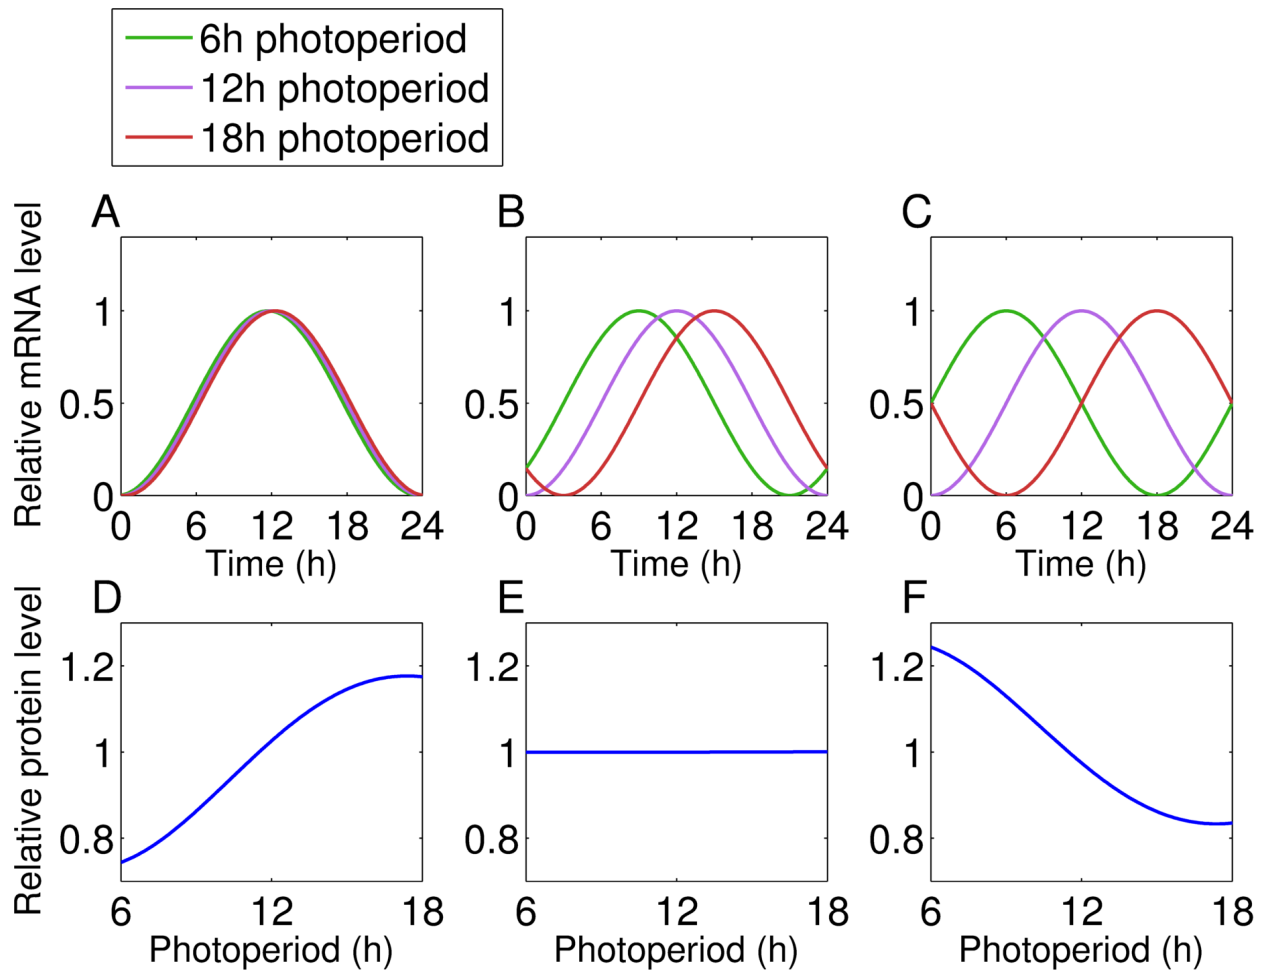

**Figure EV9. Simulation of how clock responses affect the protein response to photoperiod.**

**A - C** Clock-regulated transcript dynamics for a dawn-tracking (**A**), noon-tracking (**B**), and dusk-tracking (**C**) clock across three photoperiods. In each case, the transcript is expressed at ZT12 (i.e. dusk) in a 12h photoperiod.

**D - F** Protein responses to photoperiod for the protein encoded by the transcripts shown in **A-C**.
